# Supplementary material for: Sulfur functionalized diamondoid phosphines enable building nanocomposites interfacing sp3-carbon and gold nanolayers
Source: Royal Society of Chemistry journal article supplement (doi:10.1039/d4nr03511a), 2024-12-23
Supplement: d4nr03511a1.pdf [file d4nr03511a1.pdf]

# Sulfur functionalized diamondoid phosphines enable building nanocomposites interfacing sp<sup>3</sup>-carbon and gold nanolayer

*Moad Bouzid, Didier Poinot, Clève D. Mboyi, Lukas Ochmann, Bruno Domenichini, Peter R. Schreiner and Jean-Cyrille Hierso*

---

## CONTENT

|                                                                                                             |               |
|-------------------------------------------------------------------------------------------------------------|---------------|
| <b>S1a. NMR characterization of 9-phosphinothionediamantan-4-ol, 2</b>                                      | <b>...p1</b>  |
| <b>S1b. Synthesis and NMR characterization of 9-phosphinodiamantane-4-thiol 3</b>                           | <b>...p2</b>  |
| <b>S1c. NMR characterization of (9-hydroxydiamant-4-yl)phosphine oxide, 4</b>                               | <b>...p3</b>  |
| <b>S2. Synthesis of difunctionalized diamantane 5</b>                                                       | <b>...p4</b>  |
| <b>S3. XRD molecular structure of 9-thioacetyldiamant-4-ylphosphoryldichloride</b>                          | <b>...p4</b>  |
| <b>S4. XRD molecular structure of 9-phosphinothioldiamantan-4-ol, 2</b>                                     | <b>...p6</b>  |
| <b>S5. Physical vapor deposition of diamantane derivatives and conditions</b>                               | <b>...p8</b>  |
| <b>S6. SEM micrography of the deposit from PVD of diamantane 2</b>                                          | <b>...p9</b>  |
| <b>S7. SEM micrography of the deposit from PVD of diamantane 3</b>                                          | <b>...p16</b> |
| <b>S8. SEM micrography of the deposit from PVD of diamantane 4</b>                                          | <b>...p19</b> |
| <b>S9. SEM micrography of the deposit from PVD of diamantane 5</b>                                          | <b>...p22</b> |
| <b>S10. XPS data of the deposit from PVD of diamantane 4 and its organohybrid</b>                           | <b>...p25</b> |
| <b>S11. XPS data of the deposit from PVD of diamantane 2 and its organohybrid</b>                           | <b>...p27</b> |
| <b>S12. Thermogravimetric analysis (TGA/DSC) of difunctionalized diamantanes and gold precursor complex</b> | <b>...p30</b> |

## NMR characterization of difunctionalized diamantanes 2,3 and 4

**Figure S1a.**  $^{31}\text{P}$ ,  $^1\text{H}$  and  $^{13}\text{C}$  NMR of **2**

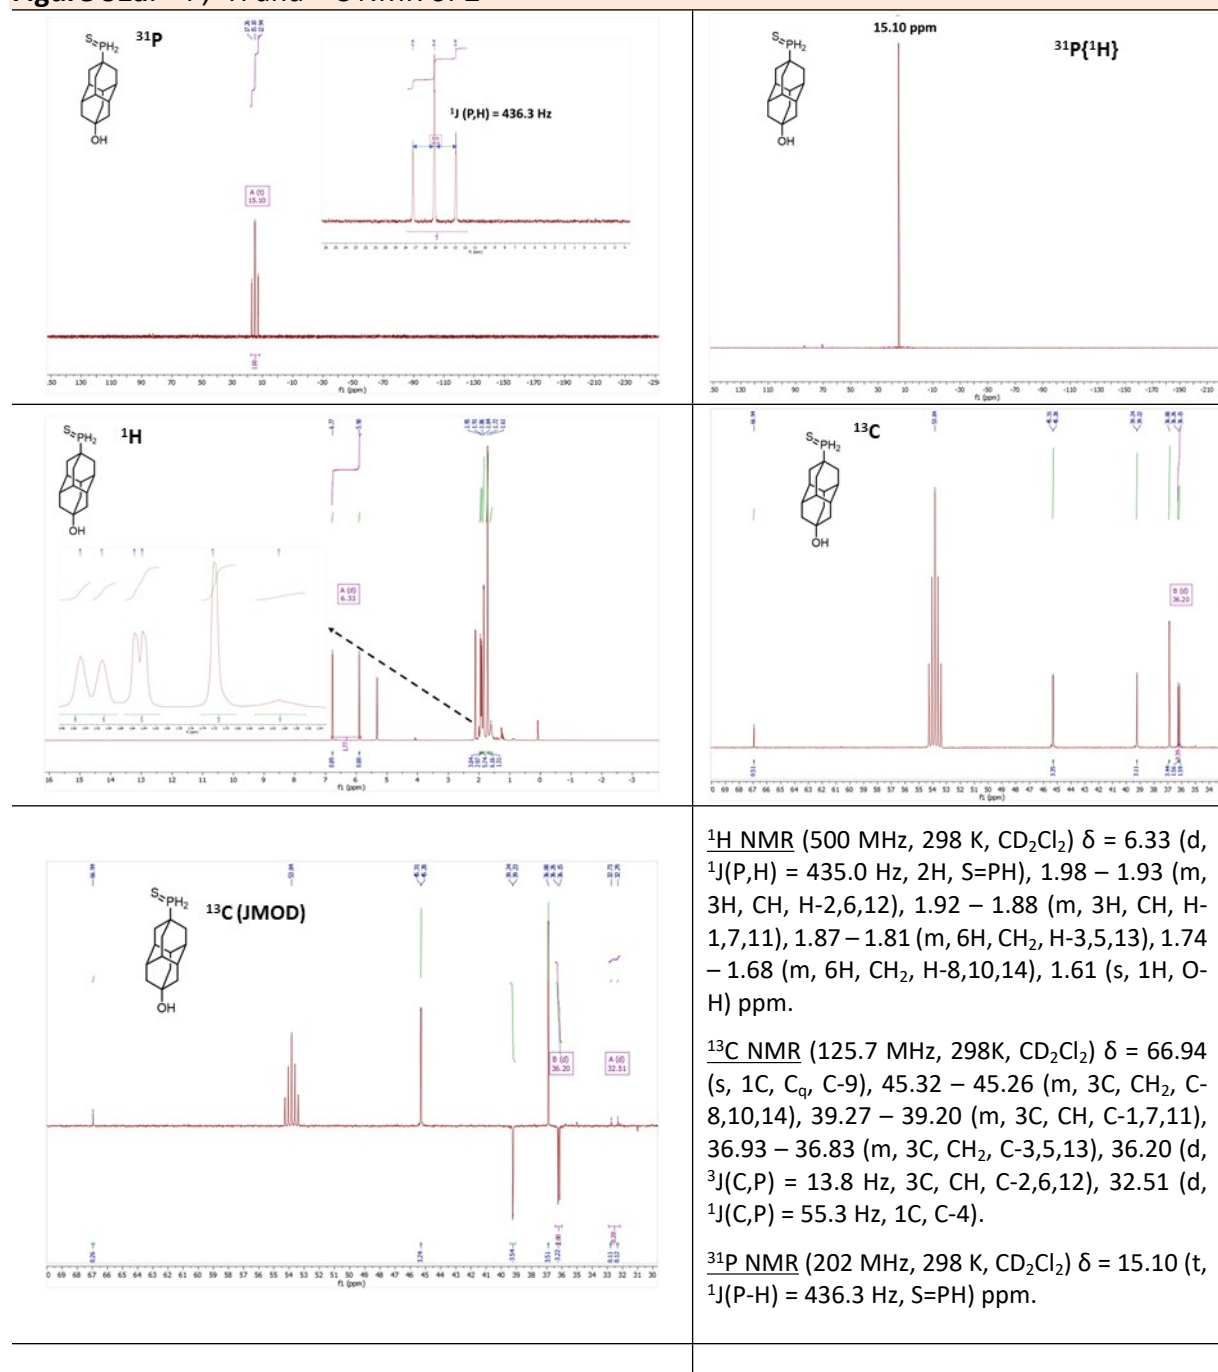

## NMR characterization of 9-phosphinodiamantane-4-thiol, **3**

**Figure S1b.**  $^{31}\text{P}$ ,  $^1\text{H}$  and  $^{13}\text{C}$  NMR of **3**

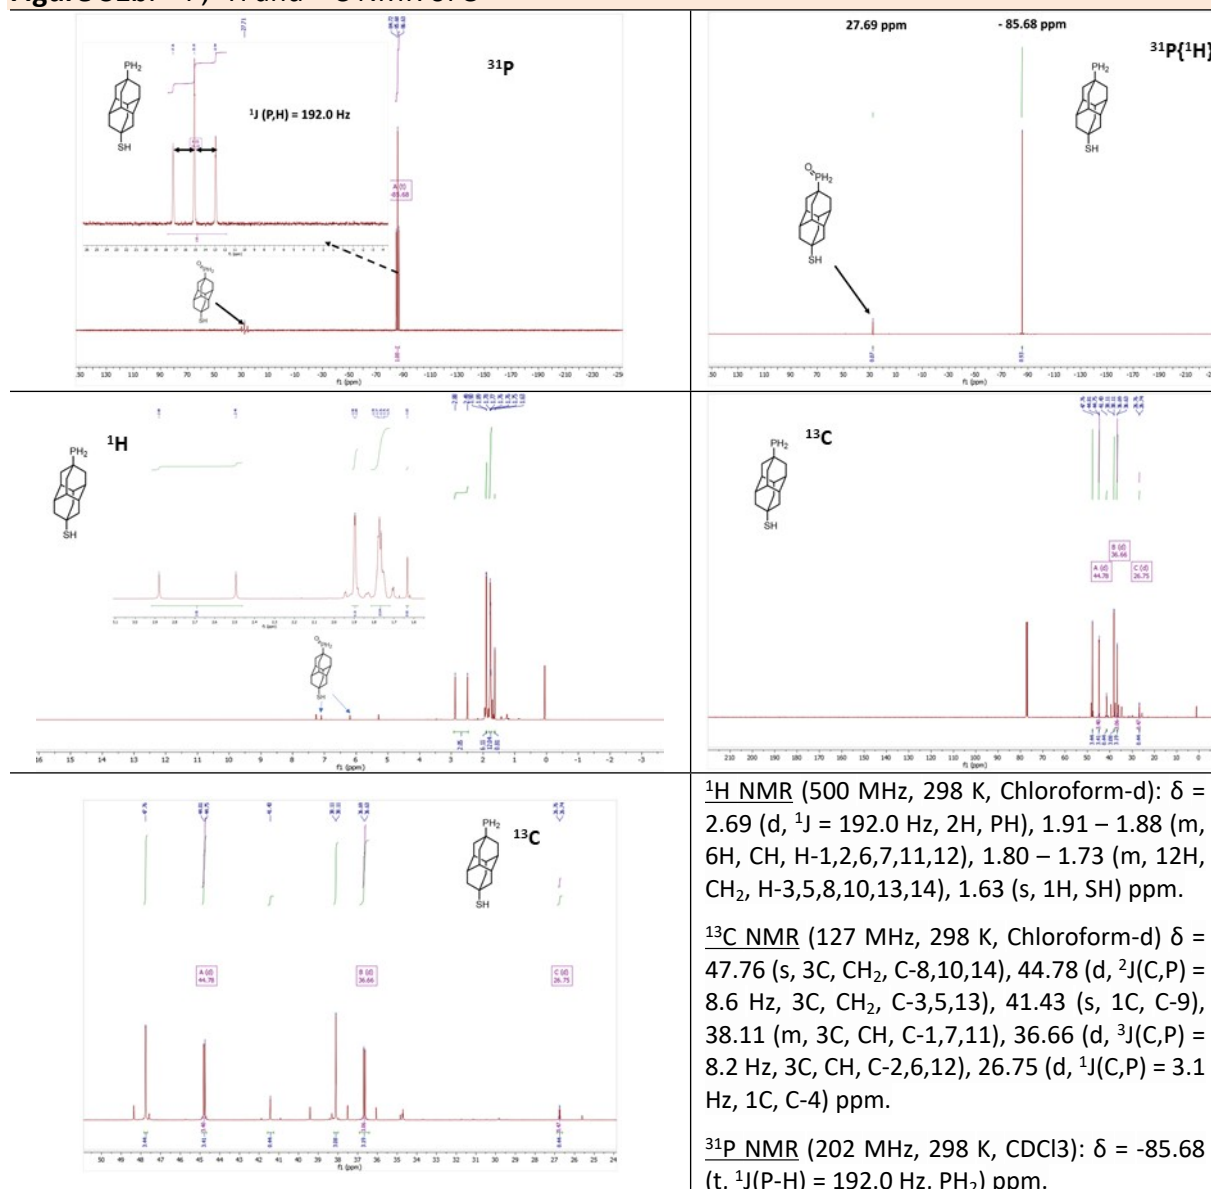

### Synthesis of (9-thioacetyldiamant-4-yl)phosphoryl dichloride (**3**) from (9-hydroxydiamant-4-yl) phosphoryl dichloride (**1a**) via **1b**:

320.2 mg (1 mmol, 1 eq.) of (9-hydroxydiamant-4-yl) phosphoryl dichloride (**1a** achieved from literature report *J. Org. Chem.* 2016, 81, 8759–8769) were dissolved with 1.5 mL (0.02 mol, 20 eq.) of freshly distilled thioacetic acid and 50  $\mu\text{L}$  (0.6 mmol, 0.6 eq.) of TfOH (triflic acid). The solution was stirred during 18h at room temperature; after addition of 2 mL of water and extraction three times with 5 mL of DCM, the organic phases were washed three times with water (3x5 mL) and dried over sodium sulfate. The phase was filtered and the solvent was evaporated. The colorless solid was obtained by purification on silica column with diethyl ether:n-pentane (1:4) giving 310.2 mg (82 %) of (9-thioacetyldiamant-4-yl) phosphoryl dichloride (**1b**).

100 mg (0.26 mmol, 1 eq.) of (9-thioacetyldiamant-4-yl) phosphoryl dichloride (**1b**) were weighed and poured into a Schlenk tube having a magnetic bar, previously dried under vacuum

and placed under a flow of nitrogen. The Schlenk was isolated and a nitrogen-vacuum sweep cycle is carried out three times, while initiating magnetic stirring. The Schlenk was then cooled to  $-60\text{ }^{\circ}\text{C}$  using an acetone-liquid nitrogen bath. 2 mL of THF was poured, followed by a dropwise addition of 0.44 mL of  $\text{LiAlH}_4$  (2.4 M in THF, 1.06 mmol, 4 eq.). Stirred for 5 hours at  $-20\text{ }^{\circ}\text{C}$ . At the end of the 5 hours of stirring, 1 mL of HCl (5 %, or saturated  $\text{NH}_4\text{Cl}$ ) was added to the mixture. Extraction then takes place with frozen dichloromethane (3x6 mL), followed by drying with  $\text{MgSO}_4$  and filtered through a funnel and cotton wool into a 100 mL flask. The solvent was evaporated by rotary evaporator. The compound phosphinodiamantane-4-thiol (**3**, 57.74 mg, 89 % yield) as a white powder was dried under vacuum and kept under argon in a fridge at  $-28\text{ }^{\circ}\text{C}$ .

### NMR characterization of (9-hydroxydiamant-4-yl)phosphine oxide, **4**

**Figure S1c.**  $^{31}\text{P}$ ,  $^1\text{H}$  and  $^{13}\text{C}$  NMR of **4**

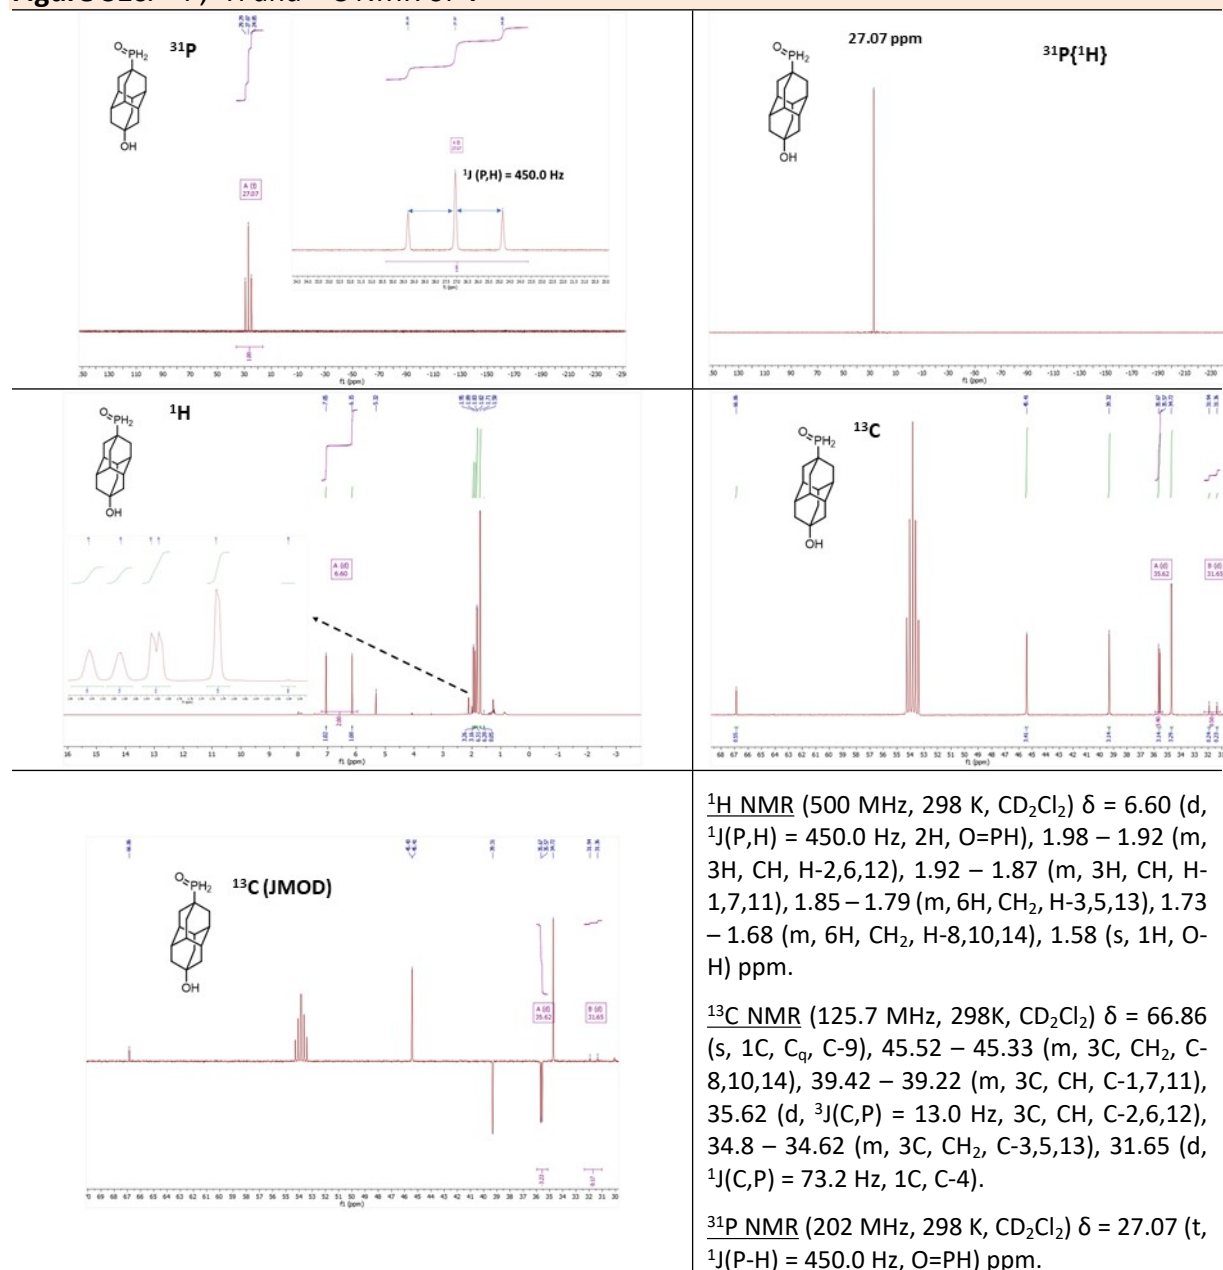



## Synthesis of difunctionalized diamondoid 5

**Figure S2.**

H. Schwertfeger, C. Würtele, M. Serafin, H. Hausmann, R. M. K. Carlson, J. E. P. Dahl, and P. R. Schreiner, J. Org. Chem. 2008, 73, 7789–7792.

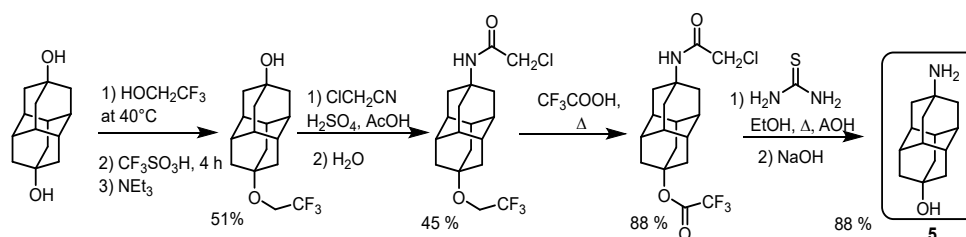

## XRD of (9-thioacetyldiamant-4-yl)phosphoryl dichloride

**Figure S3. Crystal Data and Experimental ( $R_1 = 3.63\%$ )**

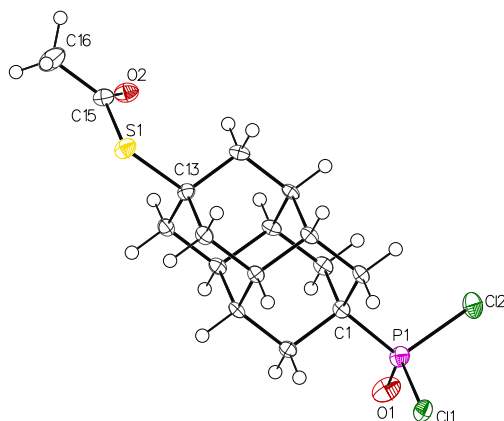

**Experimental.** Single clear, colorless needle-shaped crystals of (9-thioacetyldiamant-4-yl)phosphoryl dichloride recrystallized from a mixture of diethyl ether and pentane by slow evaporation. A suitable crystal with dimensions 0.66 x 0.08 x 0.08 mm<sup>3</sup> was selected and mounted on a MITIGEN holder oil on a Nonius Kappa Apex II diffractometer. The crystal was kept at a steady  $T = 110.0(1)$  K during data collection. The structure was solved with the **ShelXT** 2018/2 (Sheldrick, 2018) solution program using dual methods and by using **Olex2** 1.5 (Dolomanov et al., 2009) as the graphical interface. The model was refined with **ShelXL** 2018/3 (Sheldrick, 2015) using full matrix least squares minimization on  $F^2$ .

**Crystal Data.** C<sub>16</sub>H<sub>21</sub>Cl<sub>2</sub>O<sub>2</sub>PS,  $M_r = 379.26$ , monoclinic,  $P2_1/n$  (No. 14),  $a = 6.6911(2)$  Å,  $b = 21.7491(8)$  Å,  $c = 12.1069(5)$  Å,  $\beta = 103.068(2)^\circ$ ,  $\alpha = \gamma = 90^\circ$ ,  $V = 1716.23(11)$  Å<sup>3</sup>,  $T = 110.0(1)$  K,  $Z = 4$ ,  $Z' = 1$ ,  $\mu(\text{Mo K}\alpha) = 0.597$ , 44968 reflections measured, 3950 unique ( $R_{\text{int}} = 0.0618$ ) which were used in all calculations. The final  $wR_2$  was 0.0834 (all data) and  $R_1$  was 0.0363 ( $I \geq 2\sigma(I)$ ).

| Compound                              | POCl2-Diam-SAc                                                    |
|---------------------------------------|-------------------------------------------------------------------|
| Formula                               | C <sub>16</sub> H <sub>21</sub> Cl <sub>2</sub> O <sub>2</sub> PS |
| $D_{\text{calc.}} / \text{g cm}^{-3}$ | 1.468                                                             |
| $\mu / \text{mm}^{-1}$                | 0.597                                                             |
| Formula Weight                        | 379.26                                                            |
| Color                                 | clear light colorless                                             |
| Shape                                 | needle-shaped                                                     |
| Size/mm <sup>3</sup>                  | 0.66x0.08x0.08                                                    |
| $T/\text{K}$                          | 110.0(1)                                                          |
| Crystal System                        | monoclinic                                                        |
| Space Group                           | $P2_1/n$                                                          |
| $a/\text{\AA}$                        | 6.6911(2)                                                         |
| $b/\text{\AA}$                        | 21.7491(8)                                                        |
| $c/\text{\AA}$                        | 12.1069(5)                                                        |
| $\alpha/^\circ$                       | 90                                                                |
| $\beta/^\circ$                        | 103.068(2)                                                        |
| $\gamma/^\circ$                       | 90                                                                |
| $V/\text{\AA}^3$                      | 1716.23(11)                                                       |
| $Z$                                   | 4                                                                 |
| $Z'$                                  | 1                                                                 |
| Wavelength/Å                          | 0.71073                                                           |
| Radiation type                        | Mo K $\alpha_1$                                                   |
| $\theta_{\text{min}}/^\circ$          | 3.211                                                             |
| $\theta_{\text{max}}/^\circ$          | 27.533                                                            |
| Measured Refl's.                      | 44968                                                             |
| Indep't Refl's                        | 3950                                                              |
| Refl's $I \geq 2\sigma(I)$            | 3103                                                              |
| $R_{\text{int}}$                      | 0.0618                                                            |
| Parameters                            | 200                                                               |
| Restraints                            | 0                                                                 |
| Largest Peak                          | 0.457                                                             |
| Deepest Hole                          | -0.263                                                            |
| GooF                                  | 1.079                                                             |
| $wR_2$ (all data)                     | 0.0834                                                            |
| $wR_2$                                | 0.0754                                                            |
| $R_1$ (all data)                      | 0.0556                                                            |
| $R_1$                                 | 0.0363                                                            |

## Structure Quality Indicators

|                     |                                 |       |                 |      |                  |       |            |       |
|---------------------|---------------------------------|-------|-----------------|------|------------------|-------|------------|-------|
| <b>Reflections:</b> | d min (Mo)<br>2 $\theta$ =55.1° | 0.77  | I/ $\sigma$ (I) | 31.1 | R <sub>int</sub> | 6.18% | Full 50.5° | 99.9  |
| <b>Refinement:</b>  | Shift                           | 0.000 | Max Peak        | 0.5  | Min Peak         | -0.3  | Goof       | 1.079 |

A clear, colorless needle-shaped crystal with dimensions 0.66 x 0.08 x 0.08 mm<sup>3</sup> was mounted on a MITIGEN holder oil. Data were collected using a Nonius Kappa Apex II diffractometer operating at  $T = 110.0(1)$  K. Data were measured using  $\phi$  and  $\omega$  scans with Mo K $_{\alpha 1}$  radiation. The diffraction pattern was indexed and the total number of runs, and images was based on the strategy calculation from the program APEX4 (Bruker, 2021). The maximum resolution that was achieved was  $\theta = 27.533^\circ$  (0.77 Å). The unit cell was refined using SAINT V8.40B (Bruker, 2016) on 8103 reflections, 18% of the observed reflections. Data reduction, scaling and absorption corrections were performed using SAINT V8.40B (Bruker, 2016). The final completeness is 99.90 % out to  $27.533^\circ$  in  $\theta$ . SADABS-2016/2 (Bruker, 2016) was used for absorption correction.  $wR_2(\text{int})$  was 0.0674 before and 0.0558 after correction. The ratio of minimum to maximum transmission was 0.9108. The  $\lambda/2$  correction factor is not present. The absorption coefficient  $\mu$  of this material is 0.597 mm<sup>-1</sup> at this wavelength ( $\lambda = 0.71073$  Å) and the minimum and maximum transmissions are 0.833 and 0.914. The structure was solved, and the space group  $P2_1/n$  (# 14) determined by the ShelXT 2018/2 (Sheldrick, 2018) structure solution program using dual methods and refined by full matrix least squares minimization on  $F^2$  using version 2018/3 of **ShelXL** 2018/3 (Sheldrick, 2015). All non-hydrogen atoms were refined anisotropically. Hydrogen atom positions were calculated geometrically and refined using the riding model. Hydrogen atom positions were calculated geometrically and refined using the riding model. There is a single molecule in the asymmetric unit, which is represented by the reported sum formula. In other words: Z is 4 and Z' is 1.

Figure S4. Crystal Data and Experimental ( $R_1=3.75\%$ )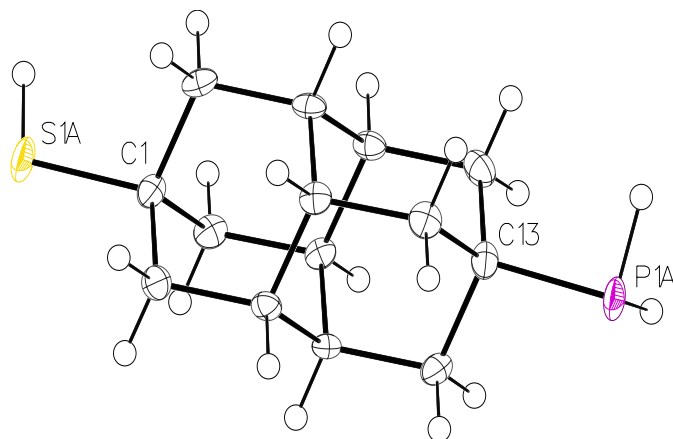

**Experimental.** Colorless needle-shaped crystals of 9-thioacetyldiamant-4-yl)phosphoryl dichloride recrystallized from DCM by slow evaporation. A suitable crystal with dimensions  $0.34 \times 0.14 \times 0.07 \text{ mm}^3$  was selected and mounted on a MITIGEN holder oil on a Nonius Kappa Apex II diffractometer. The crystal was kept at a steady  $T = 110.0(1) \text{ K}$  during data collection. The structure was solved with the **ShelXT** 2018/2 (Sheldrick, 2018) solution program using dual methods and by using **Olex2** 1.5 (Dolomanov et al., 2009) as the graphical interface. The model was refined with **ShelXL** 2018/3 (Sheldrick, 2015) using full matrix least squares minimization on  $F^2$ .

**Crystal Data.**  $\text{C}_{14}\text{H}_{21}\text{PS}$ ,  $M_r = 252.34$ , monoclinic,  $P2_1/c$  (No. 14),  $a = 7.7405(4) \text{ \AA}$ ,  $b = 13.6302(7) \text{ \AA}$ ,  $c = 12.6387(6) \text{ \AA}$ ,  $\beta = 104.820(3)^\circ$ ,  $\alpha = \gamma = 90^\circ$ ,  $V = 1289.08(11) \text{ \AA}^3$ ,  $T = 110.0(1) \text{ K}$ ,  $Z = 4$ ,  $Z' = 1$ ,  $\mu(\text{Mo K}\alpha) = 0.346$ , 25147 reflections measured, 2954 unique ( $R_{\text{int}} = 0.0474$ ) which were used in all calculations. The final  $wR_2$  was 0.1051 (all data) and  $R_1$  was 0.0375 ( $I \geq 2 \sigma(I)$ ).

| Compound                              | PH <sub>2</sub> -Diam-SH              |
|---------------------------------------|---------------------------------------|
| Formula                               | $\text{C}_{14}\text{H}_{21}\text{PS}$ |
| $D_{\text{calc.}} / \text{g cm}^{-3}$ | 1.300                                 |
| $\mu / \text{mm}^{-1}$                | 0.346                                 |
| Formula Weight                        | 252.34                                |
| Color                                 | clear light colorless                 |
| Shape                                 | needle-shaped                         |
| Size/ $\text{mm}^3$                   | $0.34 \times 0.14 \times 0.07$        |
| $T / \text{K}$                        | 110.0(1)                              |
| Crystal System                        | monoclinic                            |
| Space Group                           | $P2_1/c$                              |
| $a / \text{\AA}$                      | 7.7405(4)                             |
| $b / \text{\AA}$                      | 13.6302(7)                            |
| $c / \text{\AA}$                      | 12.6387(6)                            |
| $\alpha / ^\circ$                     | 90                                    |
| $\beta / ^\circ$                      | 104.820(3)                            |
| $\gamma / ^\circ$                     | 90                                    |
| $V / \text{\AA}^3$                    | 1289.08(11)                           |
| $Z$                                   | 4                                     |
| $Z'$                                  | 1                                     |
| Wavelength/ $\text{\AA}$              | 0.71073                               |
| Radiation type                        | Mo $\text{K}\alpha_1$                 |
| $\theta_{\text{min}} / ^\circ$        | 2.239                                 |
| $\theta_{\text{max}} / ^\circ$        | 27.498                                |
| Measured Refl's.                      | 25147                                 |
| Indep't Refl's                        | 2954                                  |
| Refl's $I \geq 2 \sigma(I)$           | 2209                                  |
| $R_{\text{int}}$                      | 0.0474                                |
| Parameters                            | 155                                   |
| Restraints                            | 0                                     |
| Largest Peak                          | 0.382                                 |
| Deepest Hole                          | -0.519                                |
| GooF                                  | 1.021                                 |
| $wR_2$ (all data)                     | 0.1051                                |
| $wR_2$                                | 0.0913                                |
| $R_1$ (all data)                      | 0.0613                                |
| $R_1$                                 | 0.0375                                |

## Structure Quality Indicators

|              |                                 |      |                 |      |                  |       |            |       |
|--------------|---------------------------------|------|-----------------|------|------------------|-------|------------|-------|
| Reflections: | d min (Mo)<br>2 $\theta$ =55.0° | 0.77 | I/ $\sigma$ (I) | 31.9 | R <sub>int</sub> | 4.74% | Full 50.5° | 100   |
| Refinement:  |                                 |      | Max Peak        | 0.4  | Min Peak         | -0.5  | Goof       | 1.021 |

A colorless needle-shaped crystal with dimensions 0.34 x 0.14 x 0.07 mm<sup>3</sup> was mounted on a MITIGEN holder oil. Data were collected using a Nonius Kappa Apex II diffractometer operating at  $T = 110.0(1)$  K. Data were measured using  $\phi$  and  $\omega$  scans with Mo  $K_{\alpha 1}$  radiation. The diffraction pattern was indexed and the total number of runs, and images was based on the strategy calculation from the program **APEX4** (Bruker, 2021). The maximum resolution that was achieved was  $\theta = 27.498^\circ$  (0.77 Å). The unit cell was refined using **SAINT V8.40B** (Bruker, 2016) on 5410 reflections, 22% of the observed reflections. Data reduction, scaling and absorption corrections were performed using **SAINT V8.40B** (Bruker, 2016). The final completeness is 100.00 % out to  $27.498^\circ$  in  $\theta$ . **SADABS-2016/2** (Bruker, 2016) was used for absorption correction.  $wR_2(\text{int})$  was 0.0543 before and 0.0500 after correction. The ratio of minimum to maximum transmission was 0.8998. The absorption coefficient  $\mu$  of this material is 0.346 mm<sup>-1</sup> at this wavelength ( $\lambda = 0.71073 \text{ \AA}$ ) and the minimum and maximum transmissions were 0.862 and 0.958. The structure was solved, and the space group  $P2_1/c$  (# 14) determined by the **ShelXT 2018/2** (Sheldrick, 2018) structure solution program using dual methods and refined by full matrix least squares minimization on  $F^2$  using version 2018/3 of **ShelXL 2018/3** (Sheldrick, 2015). All non-hydrogen atoms were refined anisotropically, excepted minor disordered part (54(1)% / 46(1)%). Hydrogen atom positions were calculated geometrically and refined using the riding model, excepted H atoms on phosphorus atom, there were located in the Fourier difference maps. Their positional parameters were either fixed with  $U_{\text{iso}}(\text{H}) = 1.2U_{\text{eq}}(\text{P})$ . There is a single molecule in the asymmetric unit, which is represented by the reported sum formula. In other words: Z is 4 and Z' is 1.

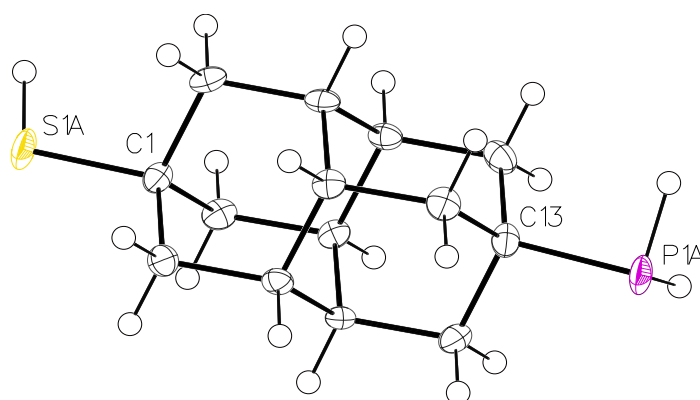

ORTEP view of major disordered part of title compound. Thermal ellipsoids are drawn at 50 % probability plot.

## Physical vapor deposition of diamantane derivatives and conditions

**Figure S5. Vapor Deposition under Controlled atmosphere (VD-CA)**

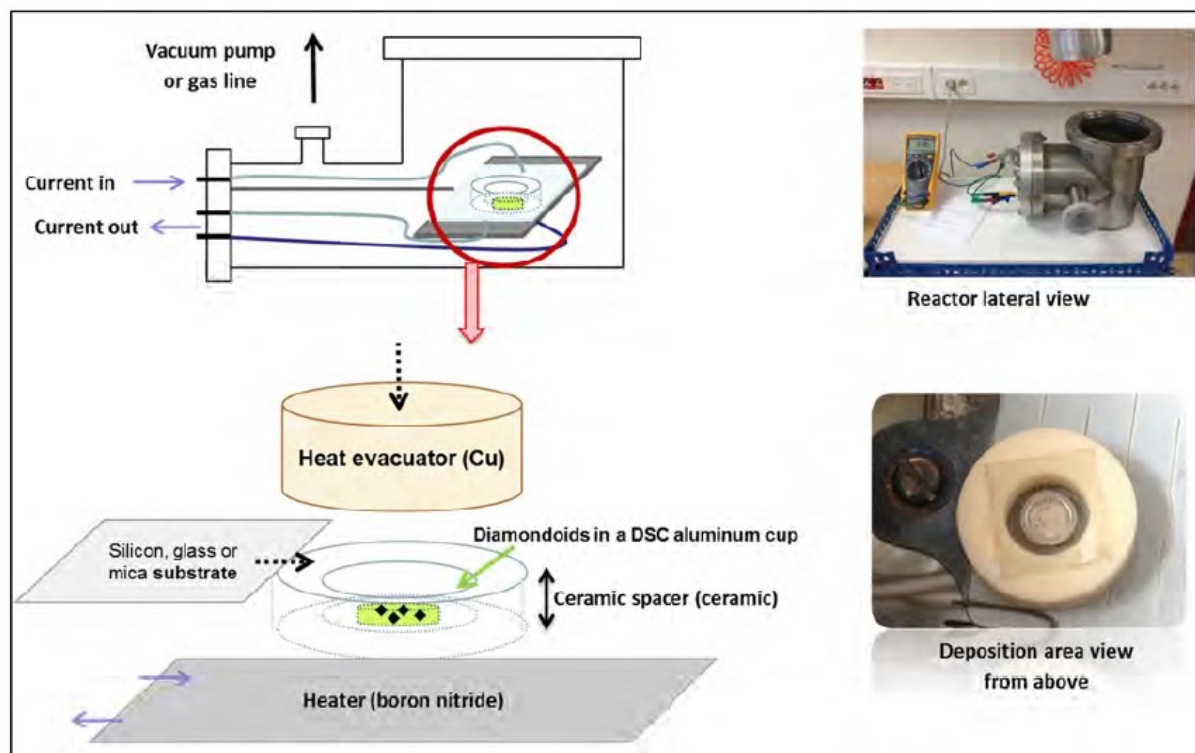

Functionalized diamondoids are deposited on silicon substrates by PVD.  $\langle 100 \rangle$  silicon wafers bought from TED PELLA, INC. are pre-cut into 10 x 10 mm. Si-chips were polished on one side and pre-cleaned but without removal of native  $\text{SiO}_2$  overlayer. The wafer thickness is between 460 and 530  $\mu\text{m}$ . The device for the deposition of diamondoids allows the sublimation of diamondoids under controlled atmosphere and their condensation on a substrate which is cooled by heat dissipation. This home-made chamber is called VD-CA (for "Vapor Deposition under Controlled Atmosphere") and is detailed in **Figure S5**. Full details on this home-made apparatus are described in *Nanoscale*, 2015, 7, 1956–1962 and its electronic supporting information ESI.



## SEM micrograph & EPMA analysis of the deposit from PVD of diamantane 2

Figure S6a. Lower temperature conditions

Compound 2 (x500) - deposition conditions: 8 min / 1A (Tmax = 76.5 °C)

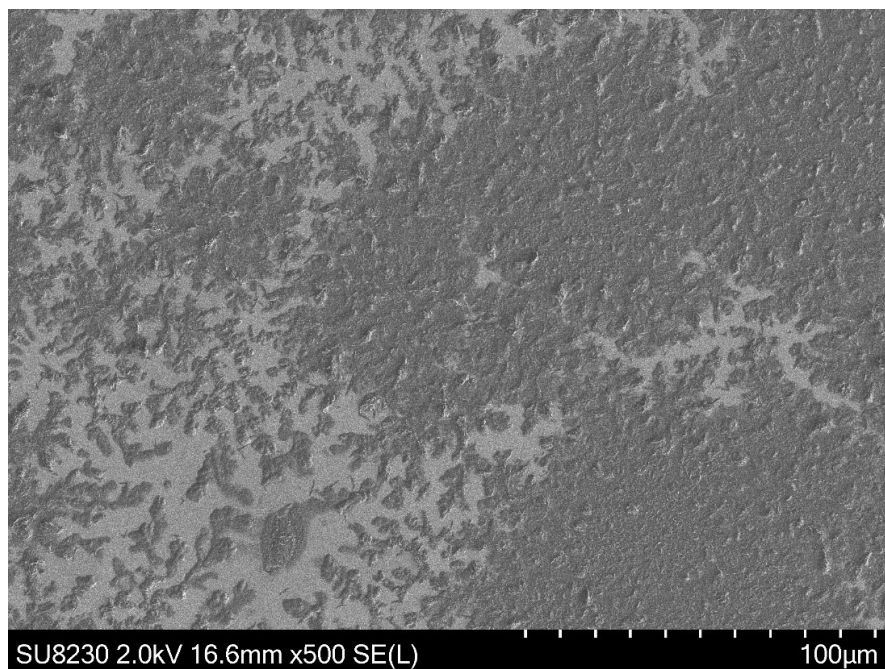

Compound 2 (x5.0 k) - deposition conditions: 8 min / 1A (Tmax = 76.5 °C)

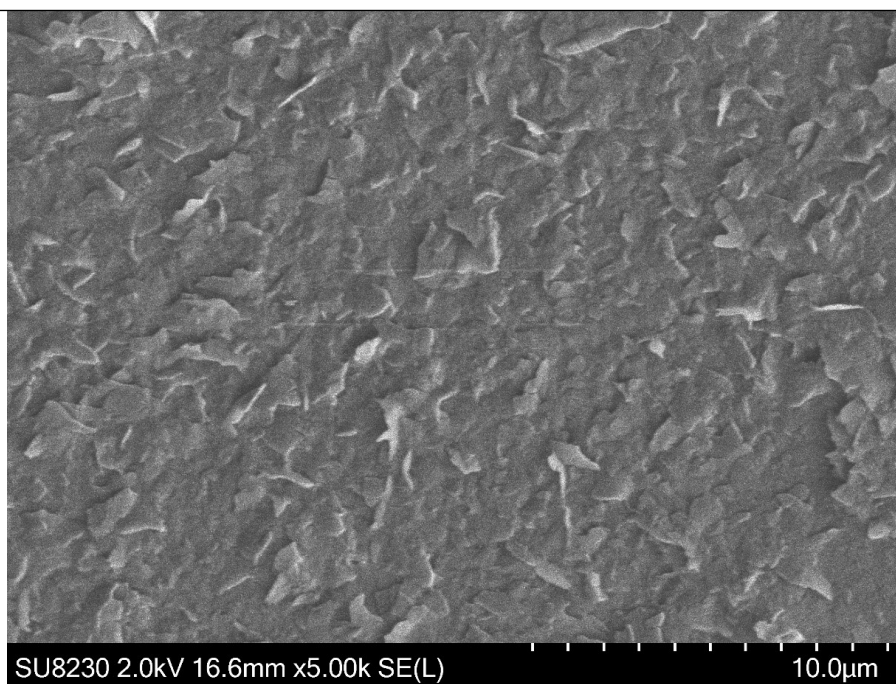



**Compound 2 (x500) - deposition conditions: 2 min / 2A (Tmax = 86.3°C)**

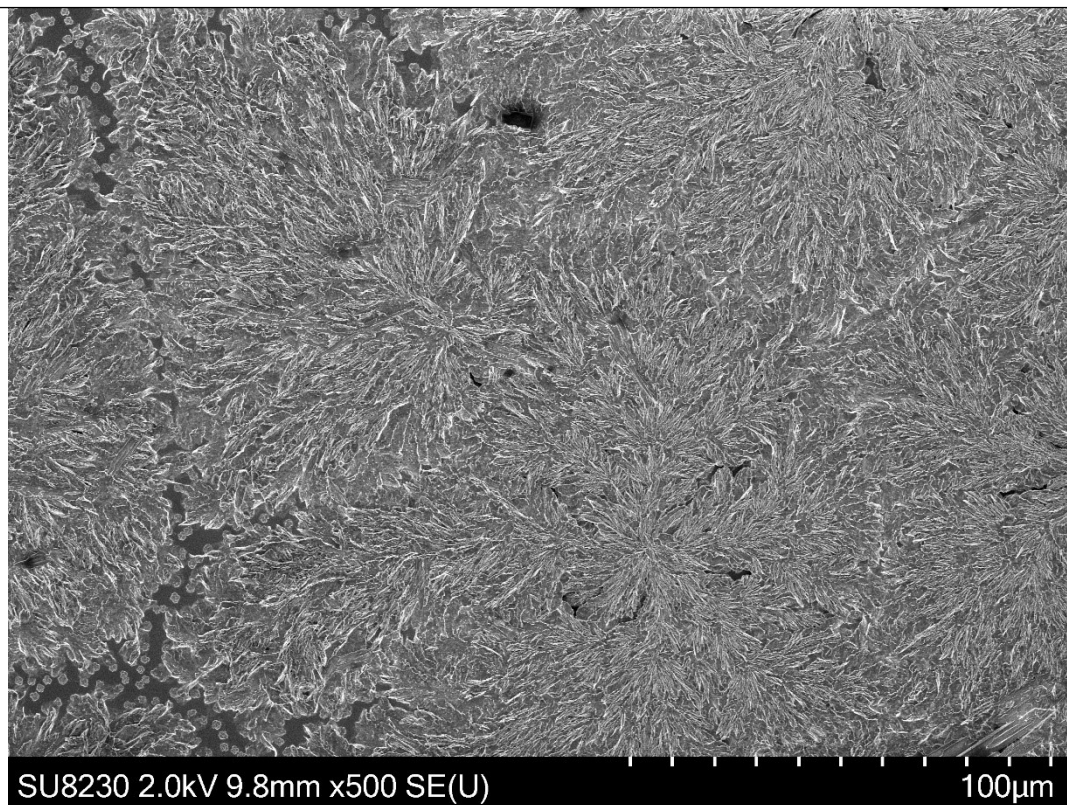

**Compound 2 (x5.0k) - deposition conditions: 2 min / 2A (Tmax = 86.3°C)**

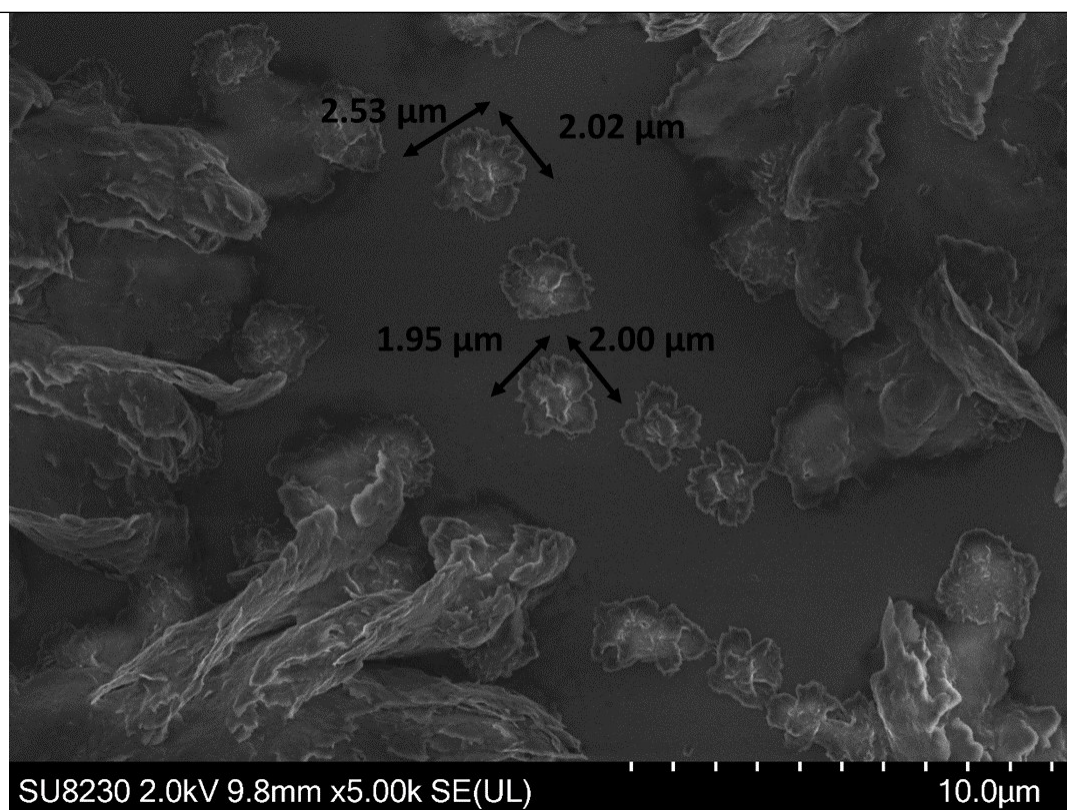



**Figure S6b. Higher temperature conditions**

**Compound 2 (x500) - deposition conditions: 2 min / 3A (Tmax = 130.2 °C)**

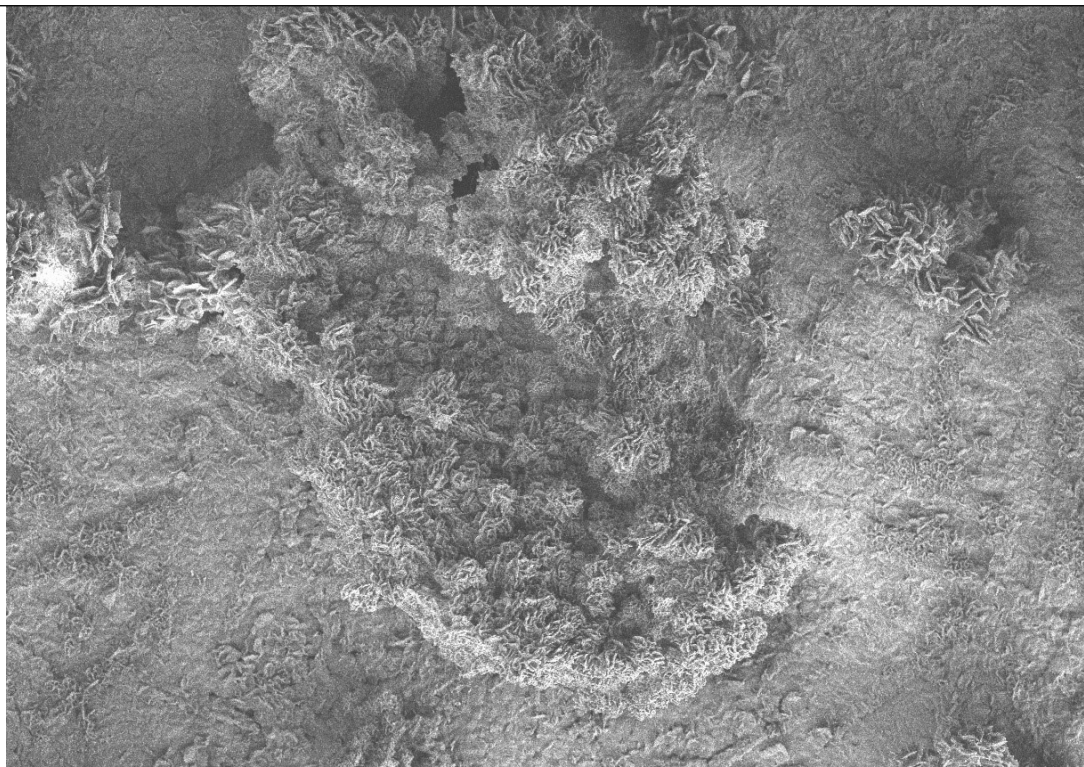

SU8230 2.0kV 16.6mm x500 SE(L)

100μm

**Compound 2 (x2.0k) - deposition conditions: 2 min / 3A (Tmax = 130.2°C)**

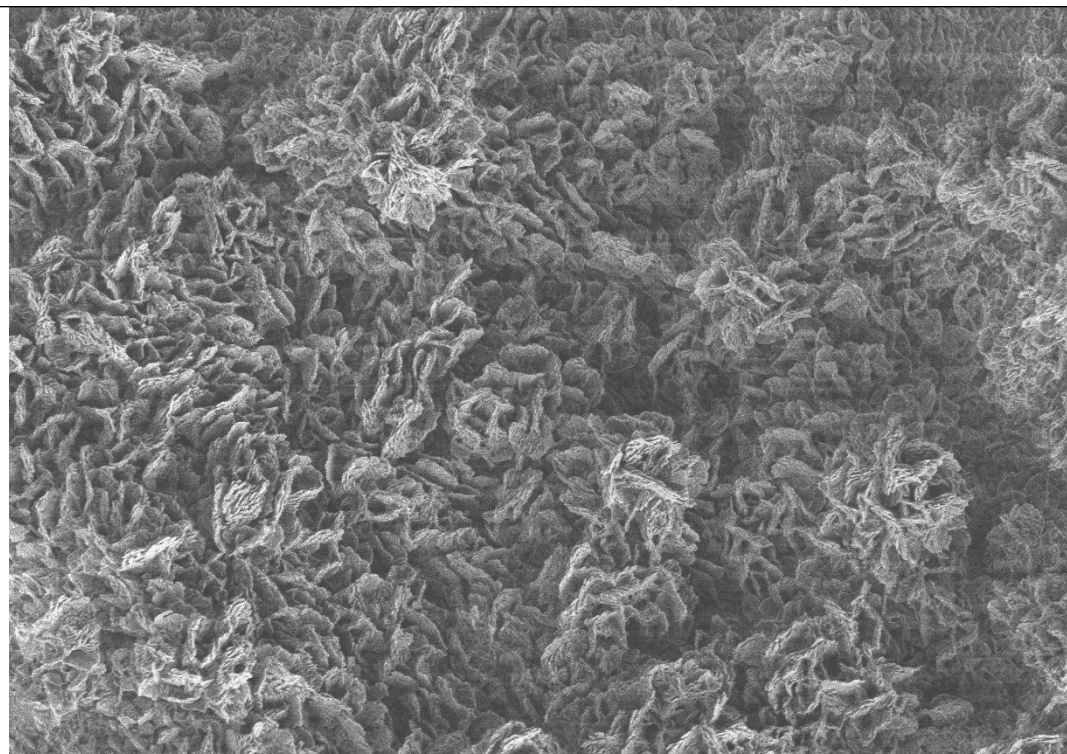

SU8230 2.0kV 16.6mm x2.00k SE(L)

20.0μm



**Compound 2 (x5.0k) - deposition conditions: 2 min / 3A (Tmax = 130.2°C)**

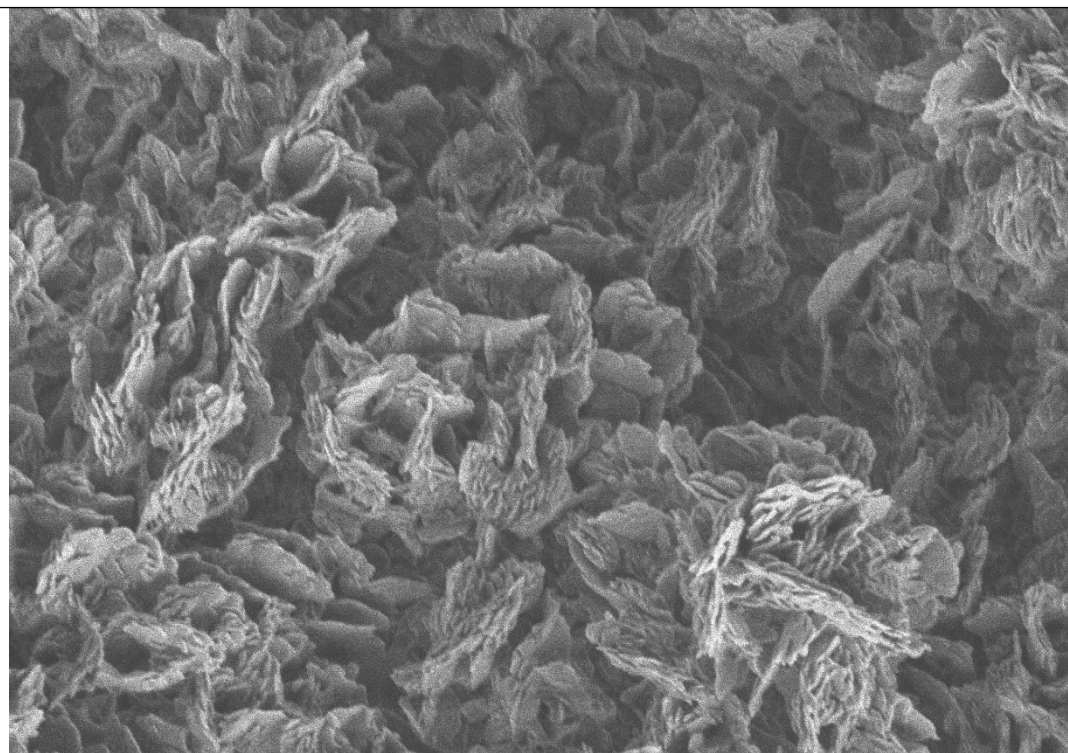

SU8230 2.0kV 16.6mm x5.00k SE(L)

10.0μm

**Figure S6c. EPMA analysis of 2 deposited at 120 °C**

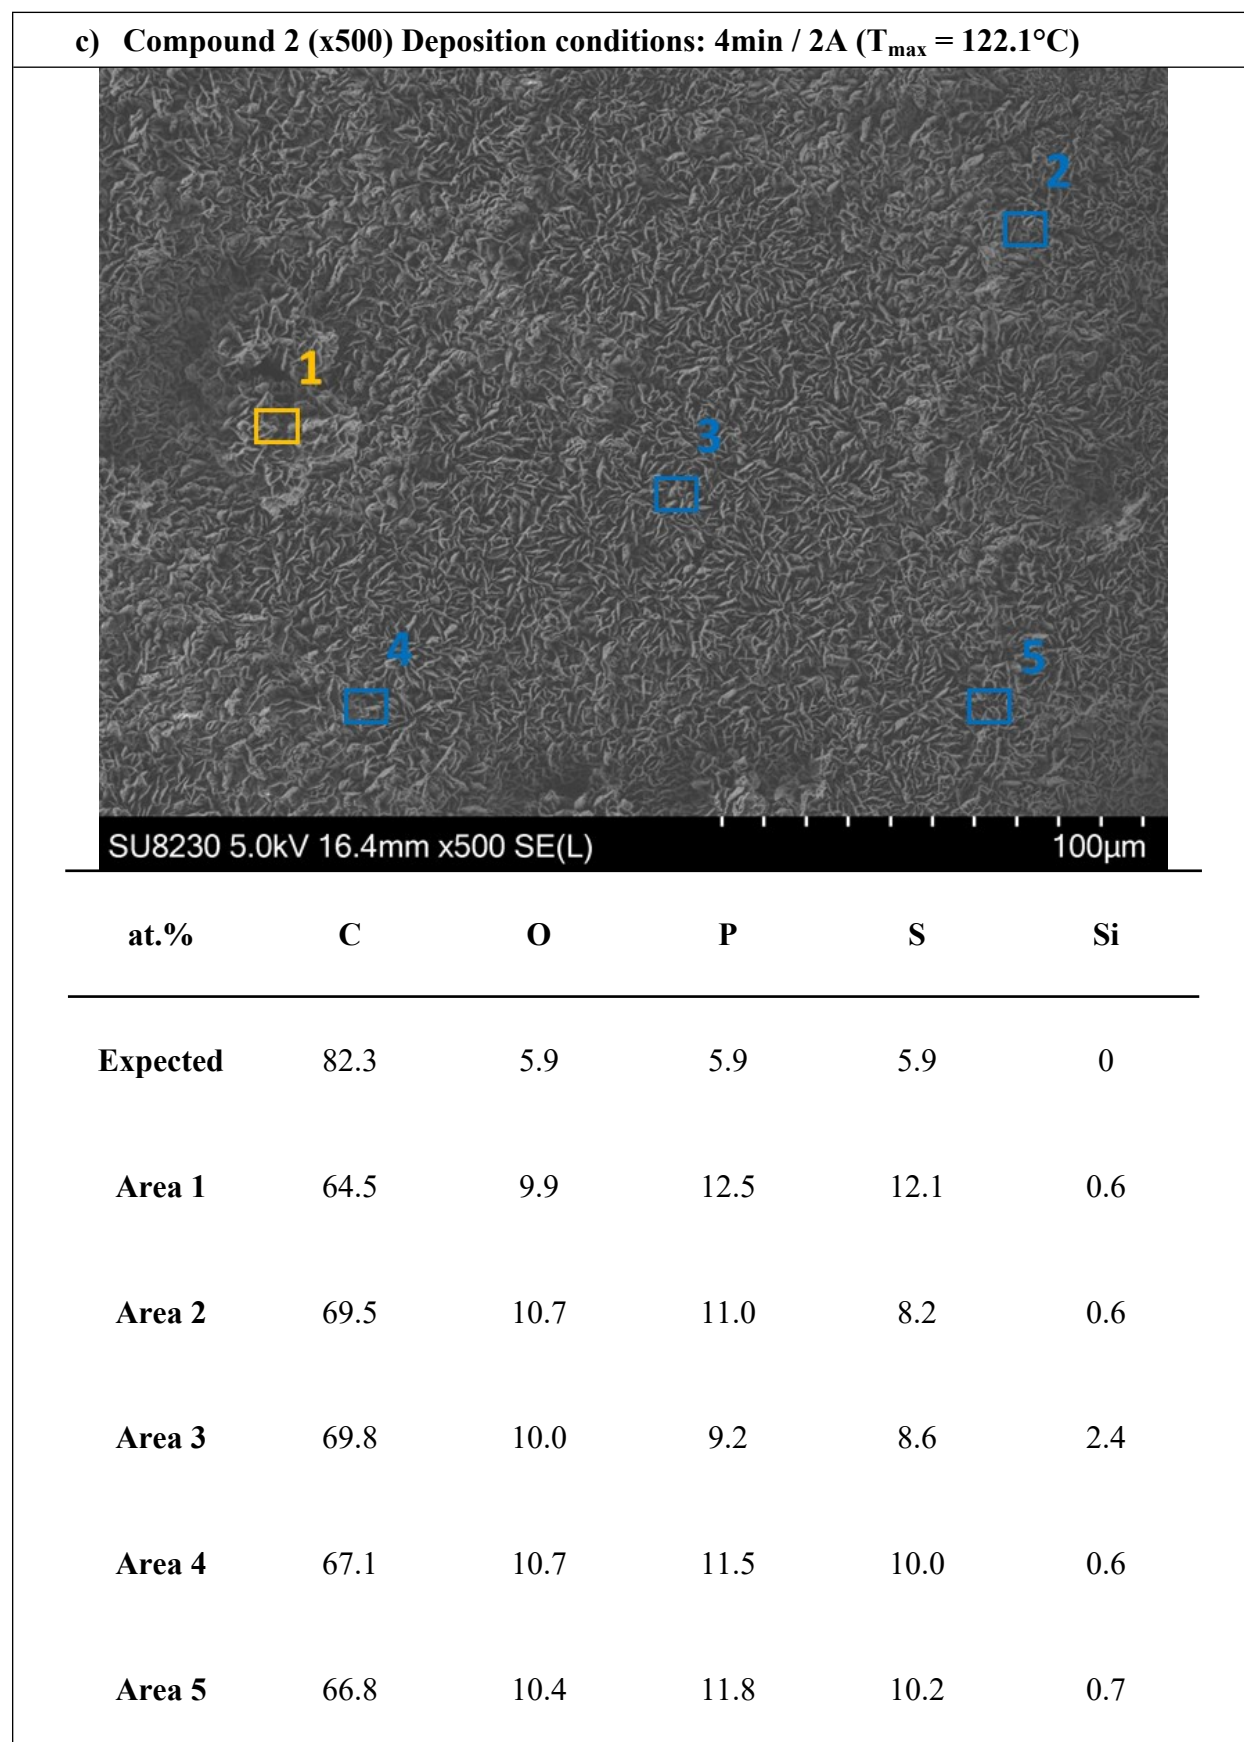

**Figure S6d. SEM micrograph of Au MOCVD on 2**

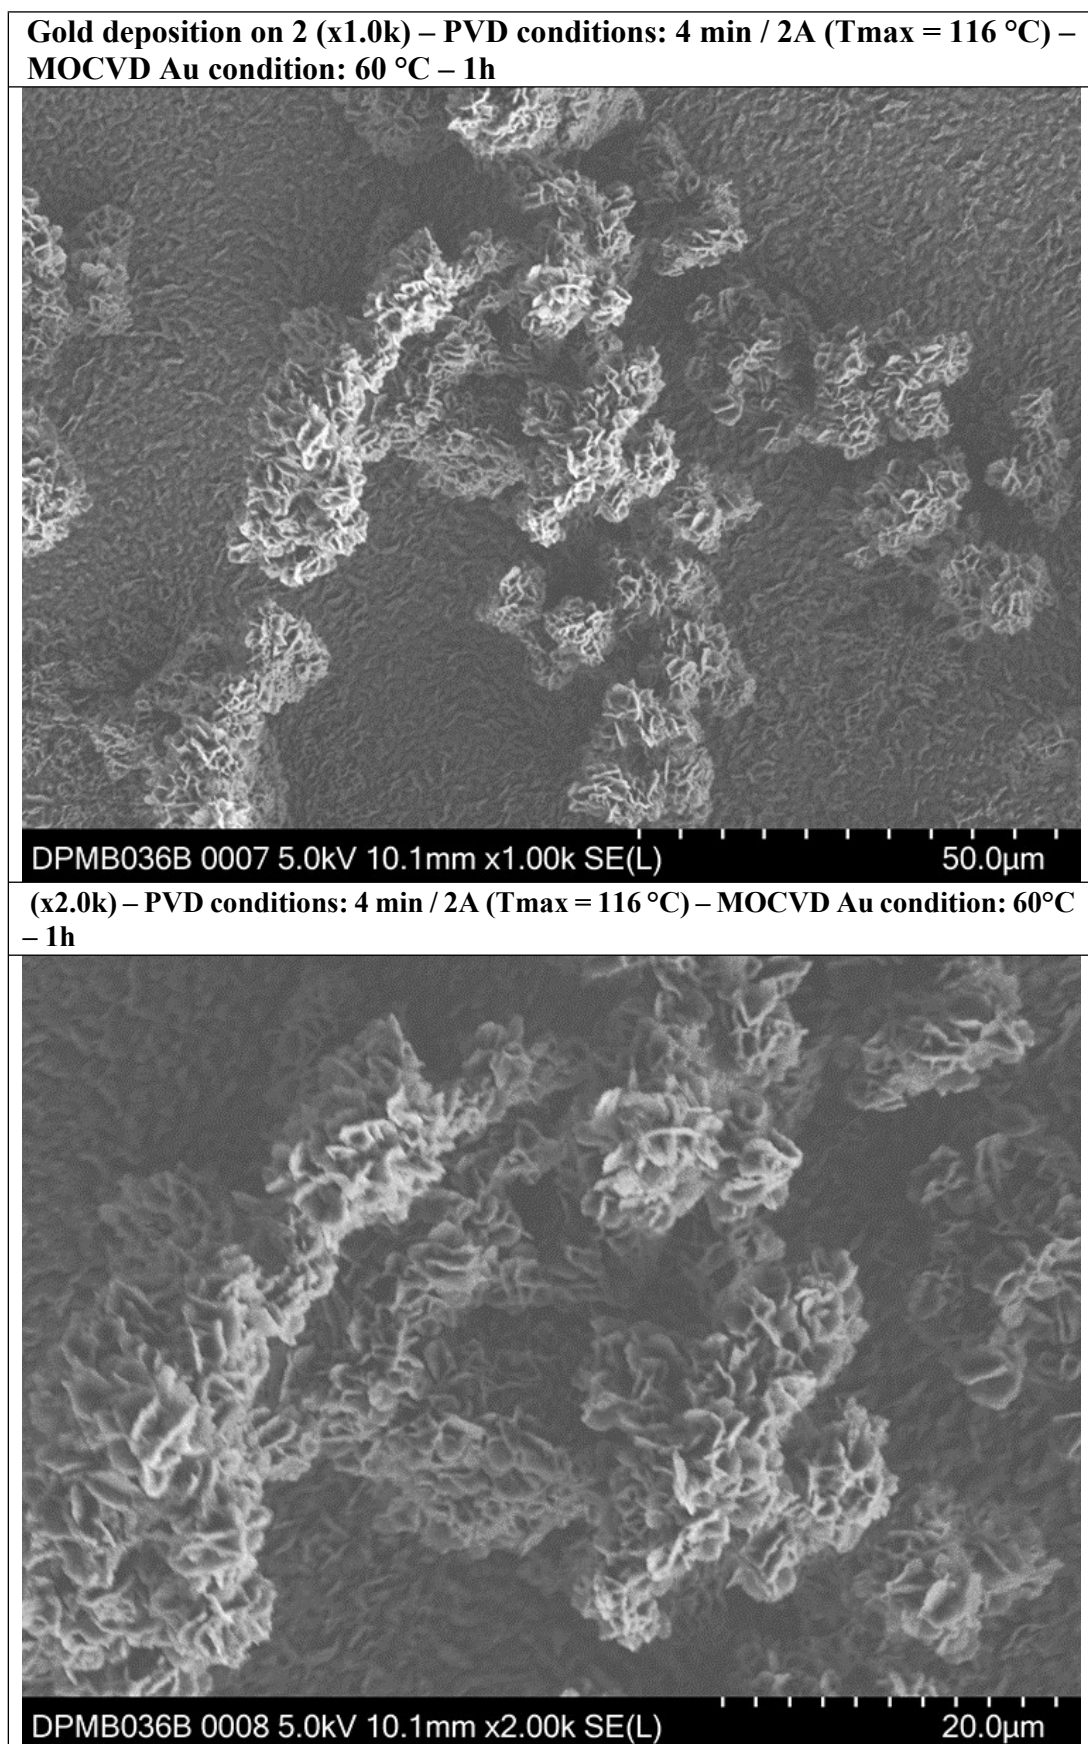



**(x5.0k) – PVD conditions: 4 min / 2A (Tmax = 116 °C) – MOCVD Au  
condition: 60°C – 1h**

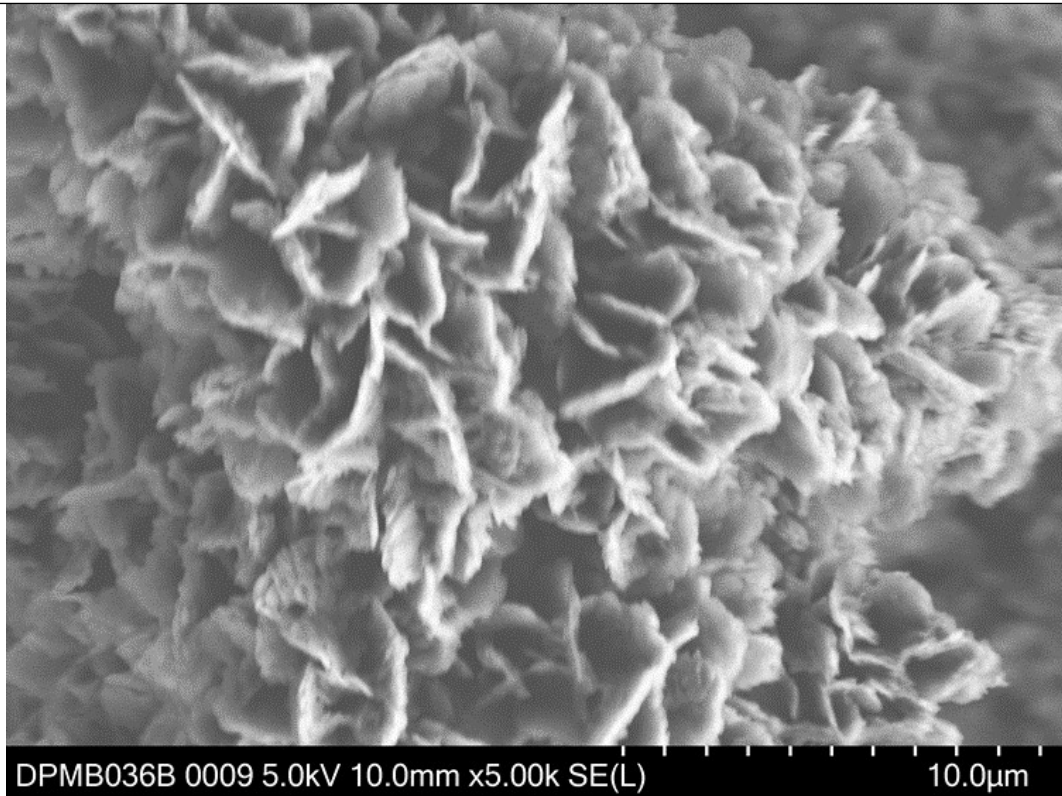

SEM micrograph of the deposit from physical vapor deposition of diamantane 3

Figure S7a. Deposition of 3 at *ca* 75 °C, 100°C and 120 °C

Compound 3 (x500) - deposition condition: 2 min / 2 A (T<sub>max</sub> = 75.9 °C)

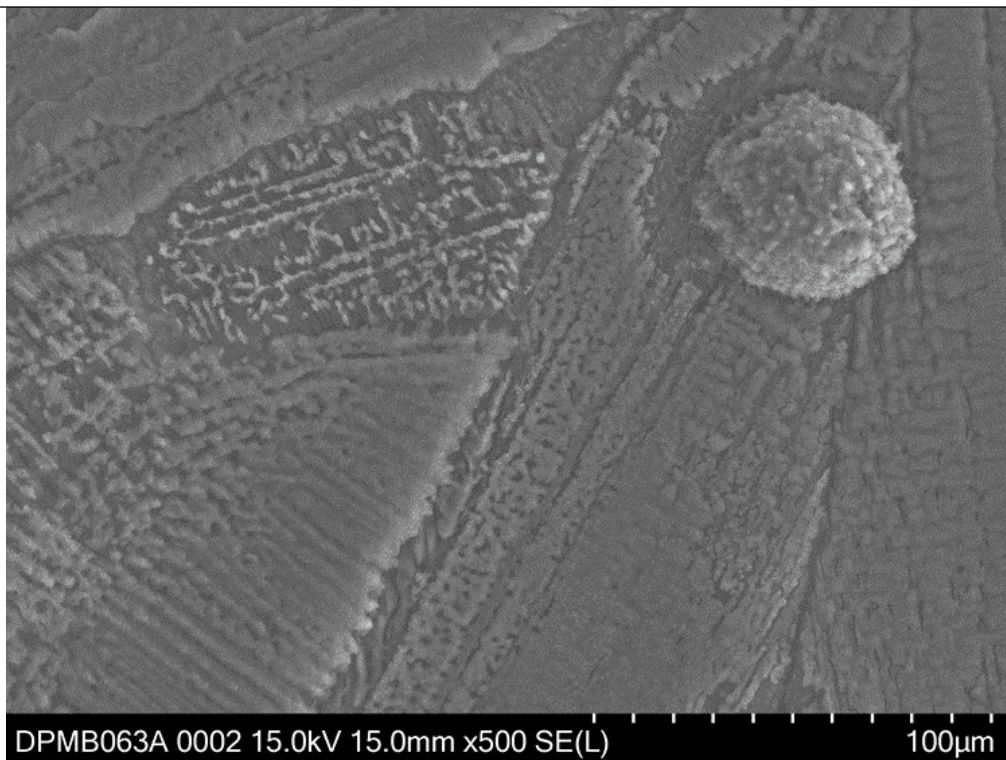

Compound 3 (x500) - deposition condition: 3 min / 2 A (T<sub>max</sub> = 98.5 °C)

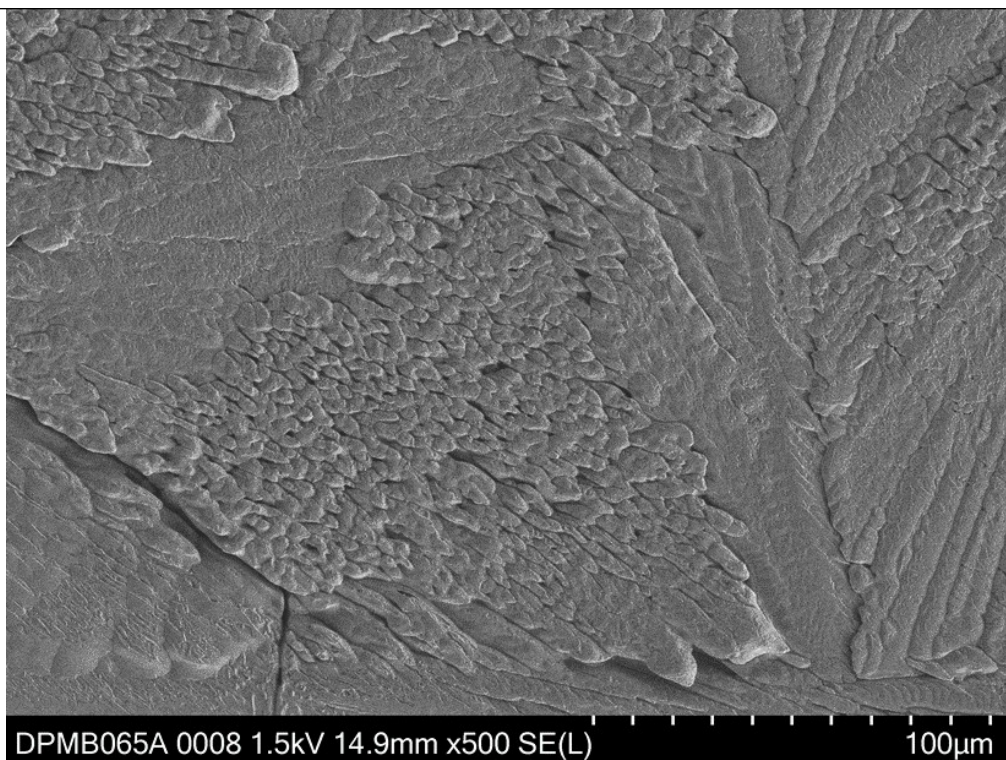



**Compound 3 (x2.0k) - deposition condition: 3 min / 2 A ( $T_{\max} = 98.5\text{ }^{\circ}\text{C}$ )**

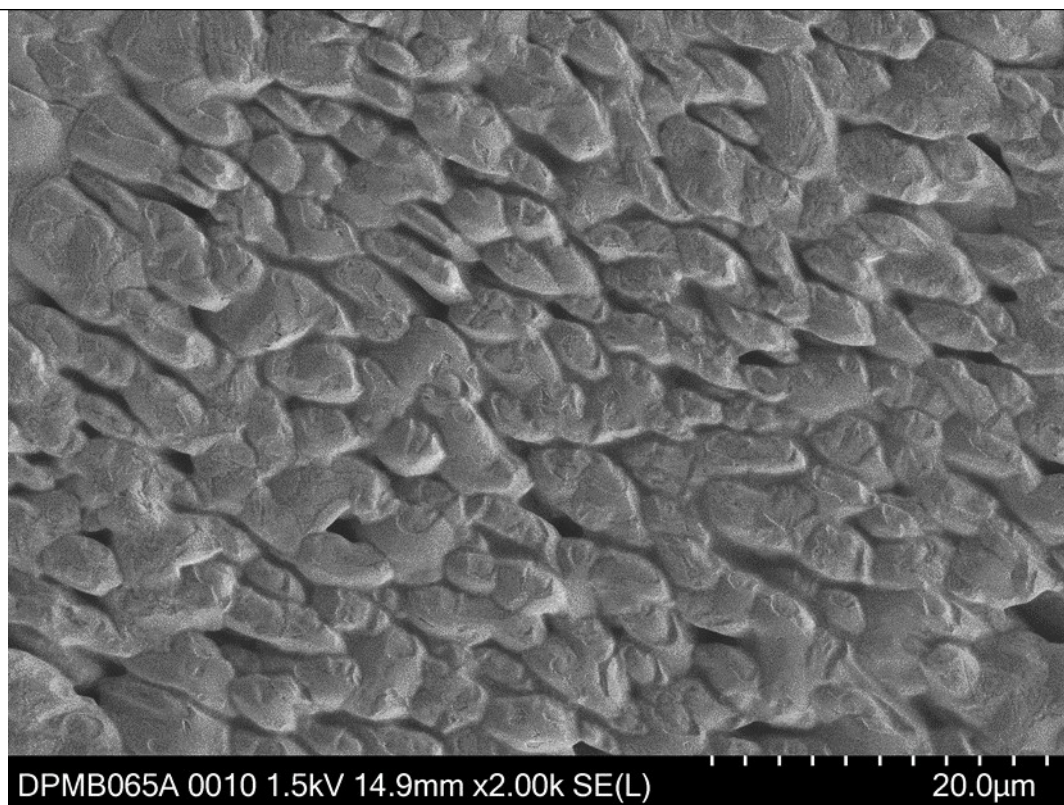

**Compound 3 (x250) -deposition condition: 4 min / 2 A ( $T_{\max} = 117\text{ }^{\circ}\text{C}$ )**

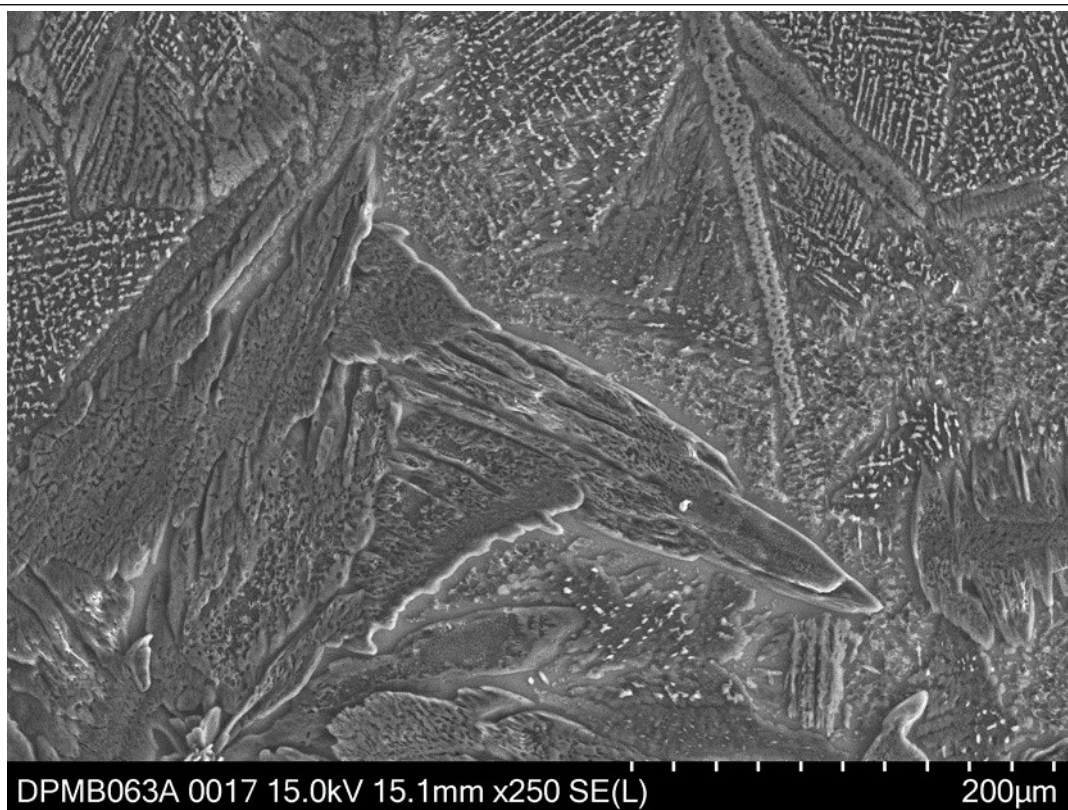

Figure S7b. High-resolution XPS spectra at P2p core level of 3

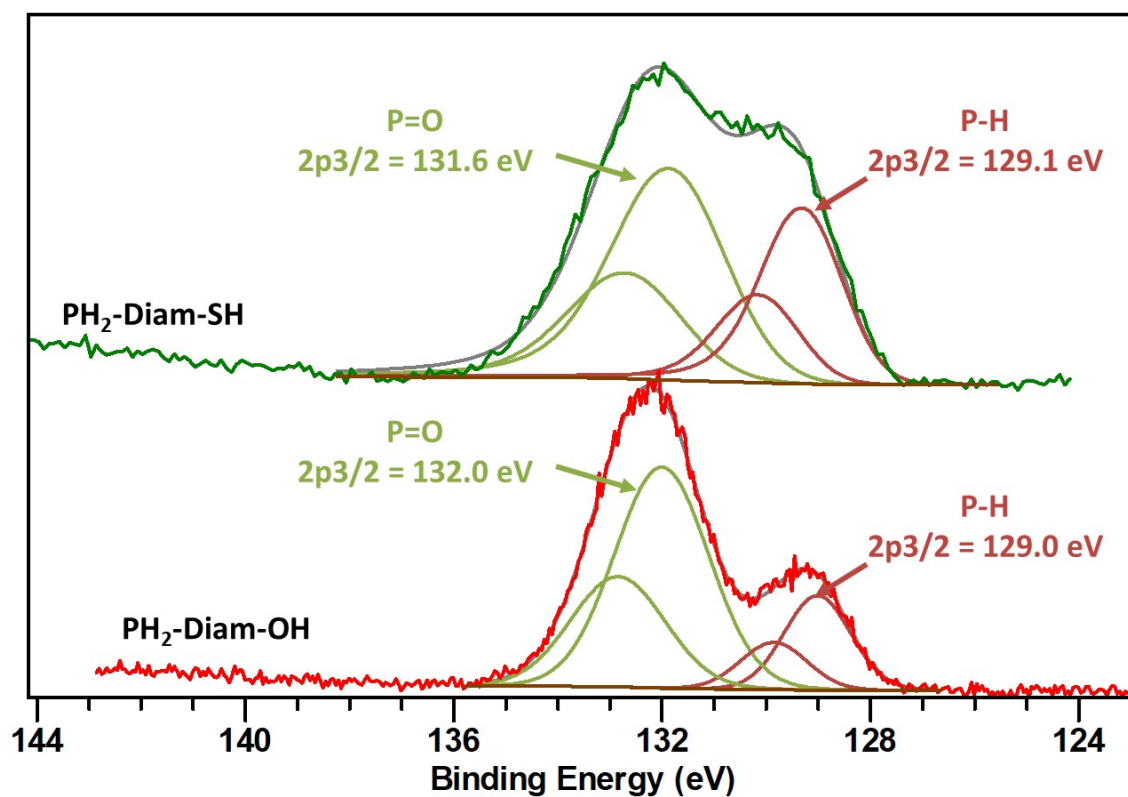

**Note:** The proportion of reduced phosphine compared to its oxidized form measured on a PVD deposit of compound **3** (top, green) is equal to 40%; whereas this proportion was only 20% for a PVD deposit of compound **1** (bottom, red) (exposure to atmospheric air is the cause of these oxidation rates).



SEM micrograph of the deposit from physical vapor deposition of diamantane 4

Figure S8a. Deposition of 4 at 85 °C, 125 °C and 145 °C

Compound 4 (x500) - deposition conditions: 2 min / 2 A (Tmax = 82.9 °C)

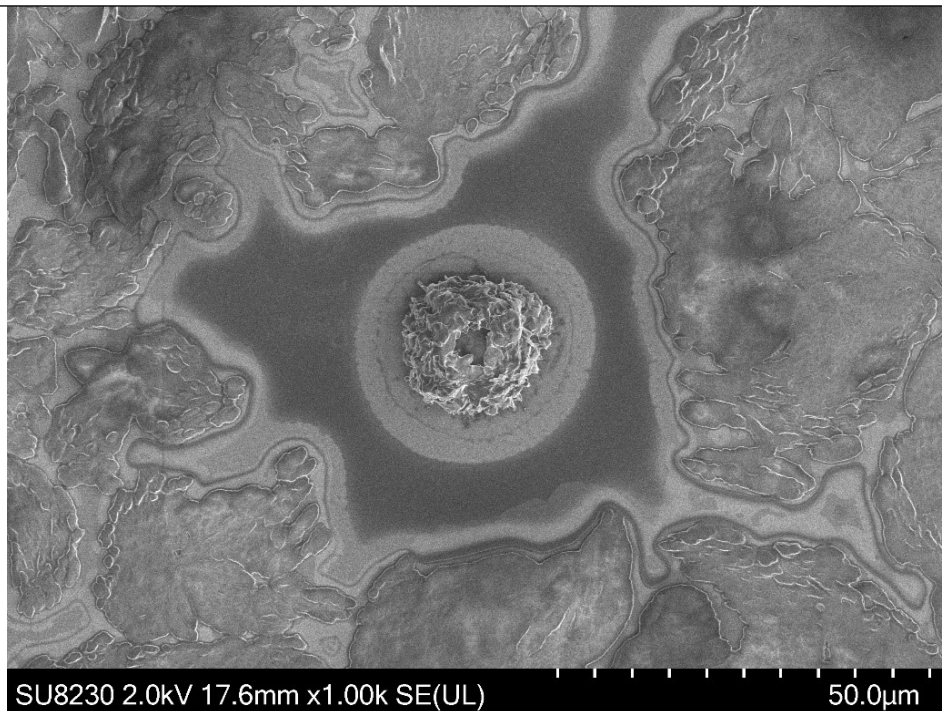

Compound 4 (x1.0k) - deposition condition: 4 min / 2 A (Tmax = 124.9 °C)

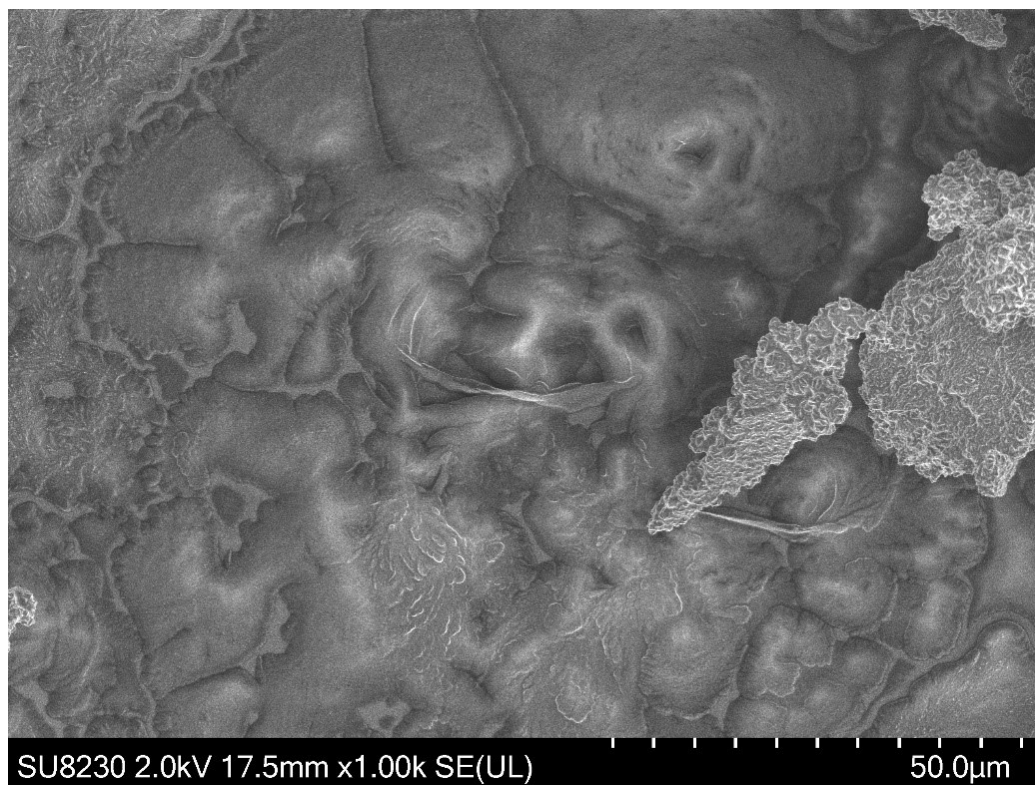



Compound 4 (x1.0k) -deposition condition: 6 min / 2 A ( $T_{\max} = 146.4^{\circ}\text{C}$ )

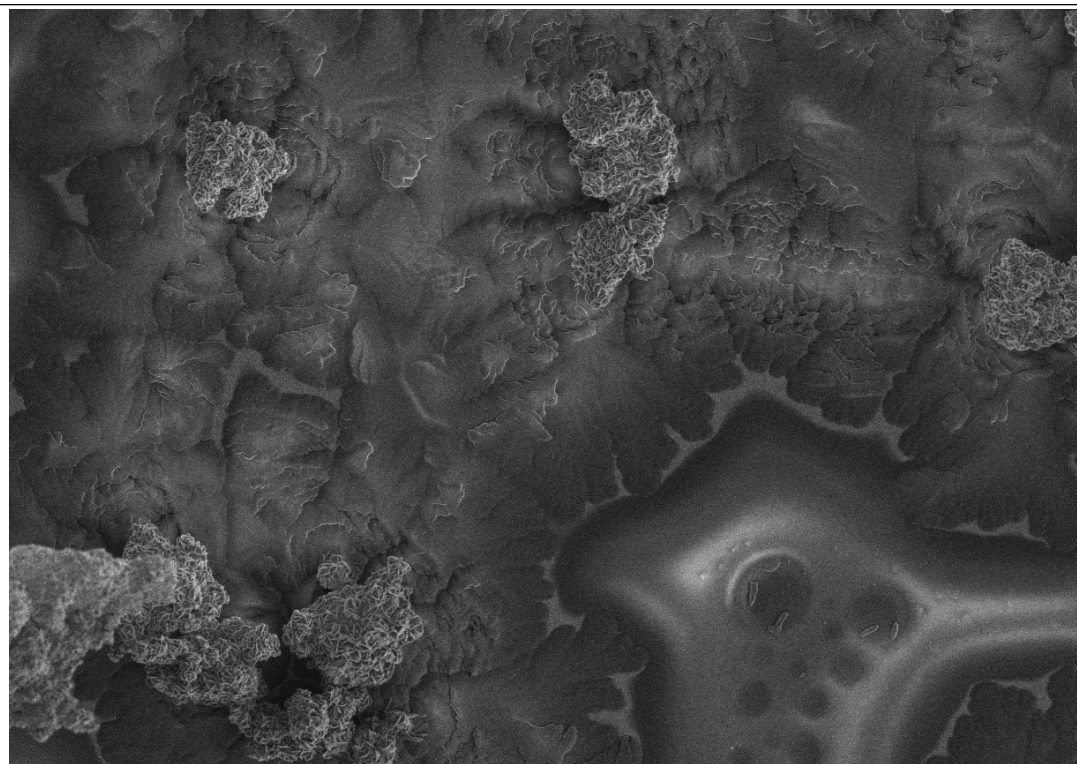

SU8230 2.0kV 17.7mm x1.00k SE(UL)

50.0μm

**Figure S8b. EPMA analysis of 4 deposited at 170 °C**

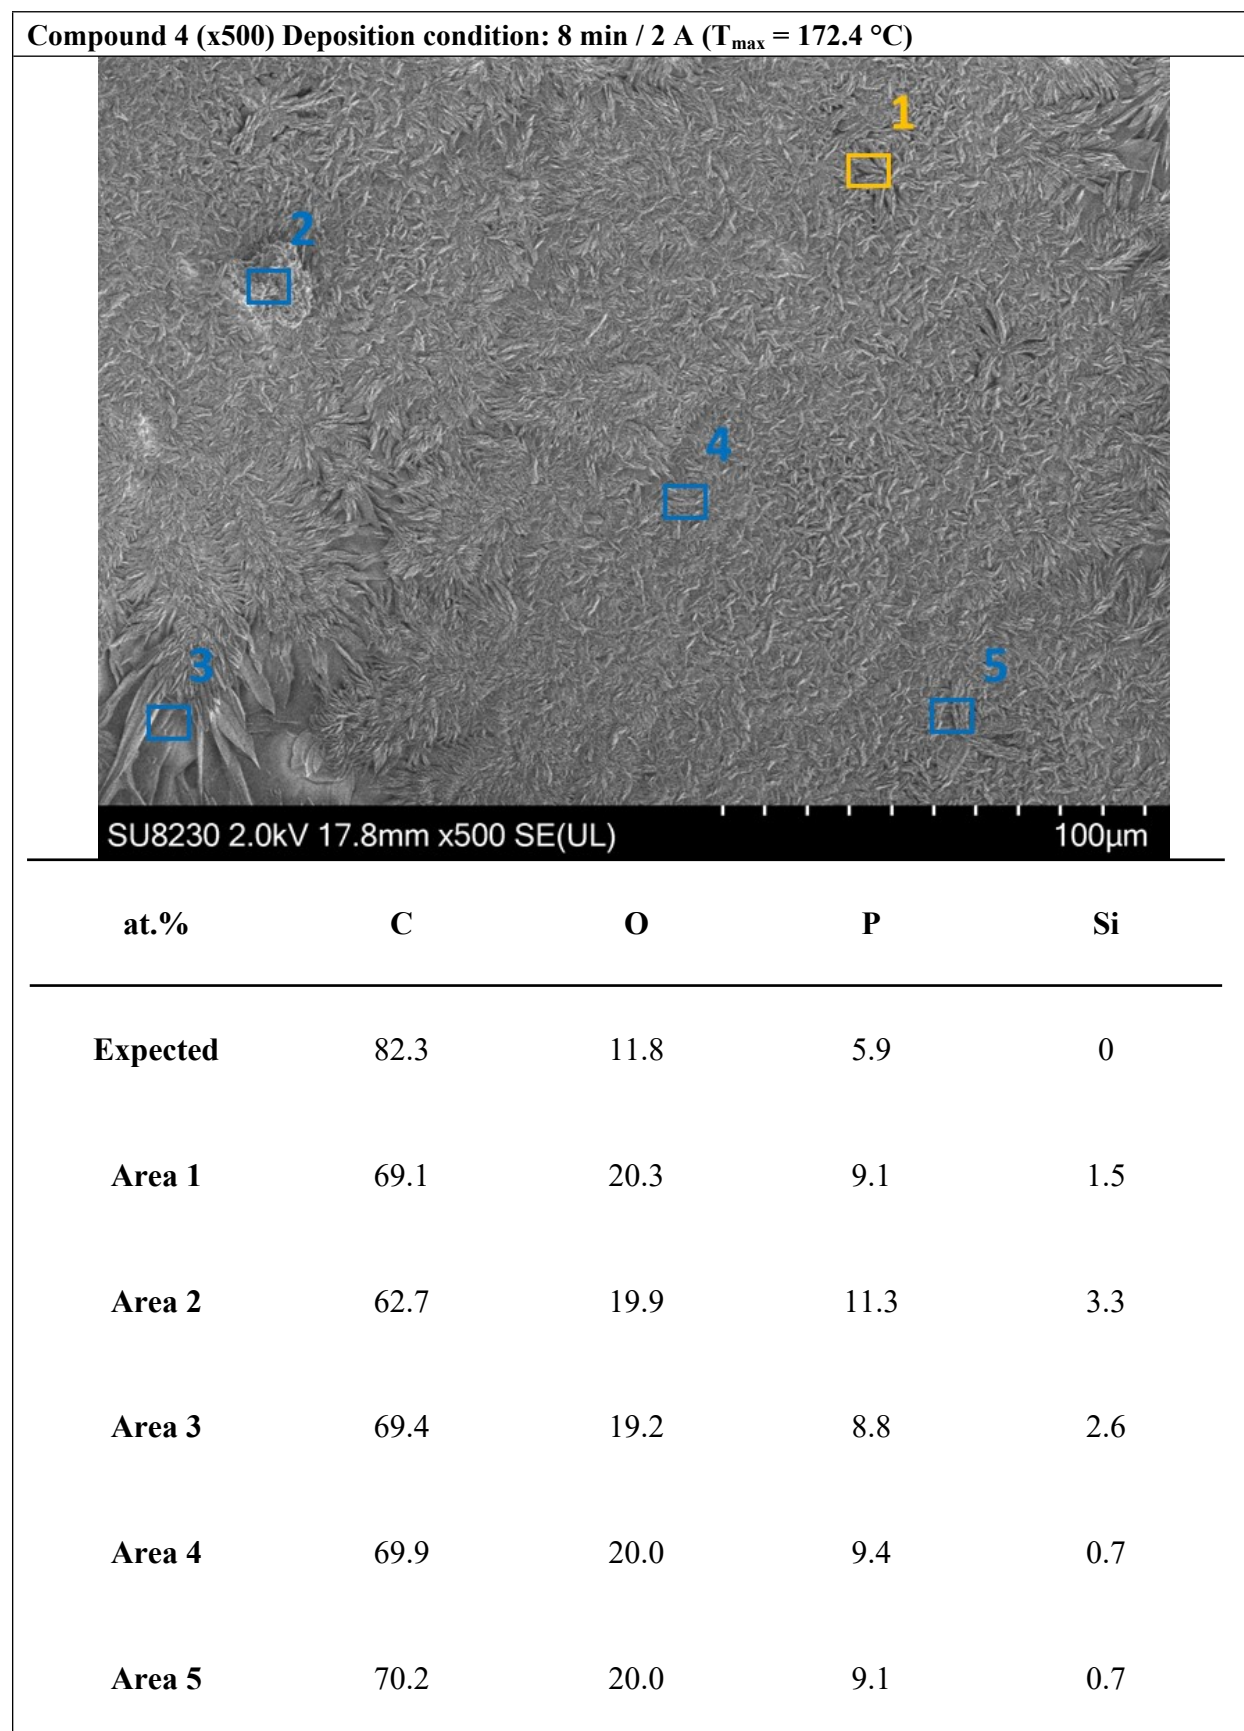

SEM micrograph of the deposit from physical vapor deposition of diamantane 5

Figure S9a. Deposition of 5 at 116 °C, 125 °C and 145 °C

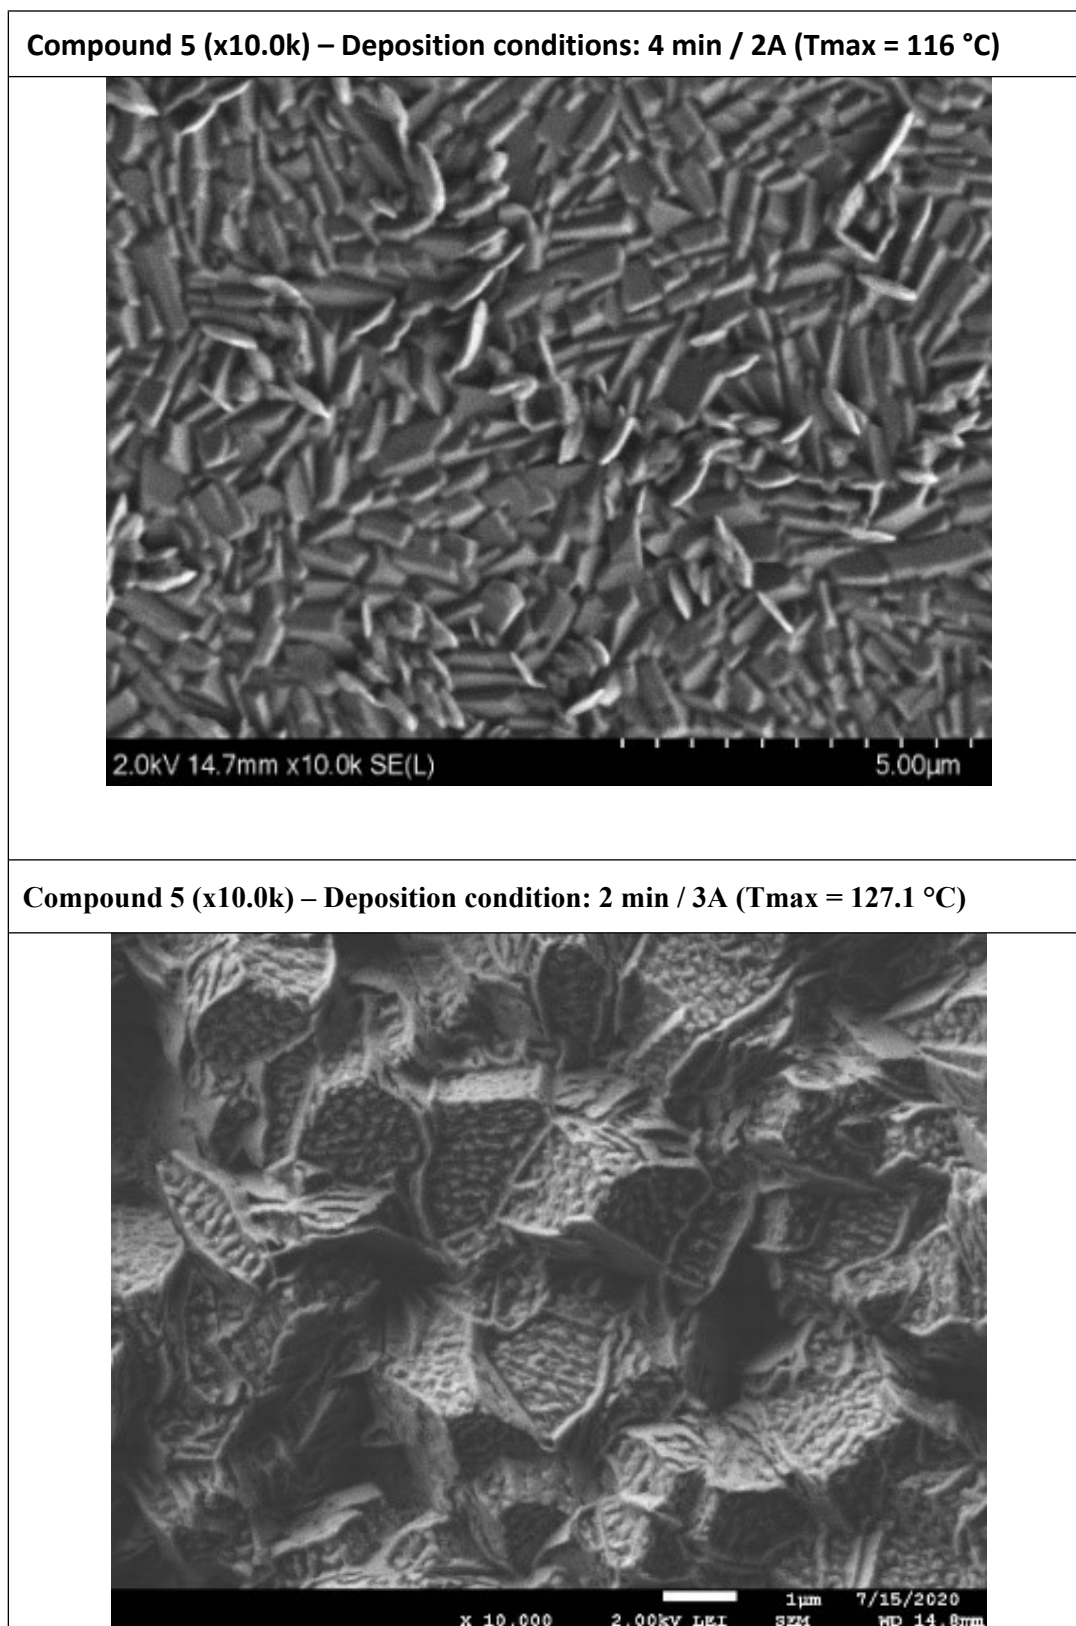

**Compound 5 (x10.0k) – Deposition conditions: 6min / 2A (Tmax = 147.8 °C)**

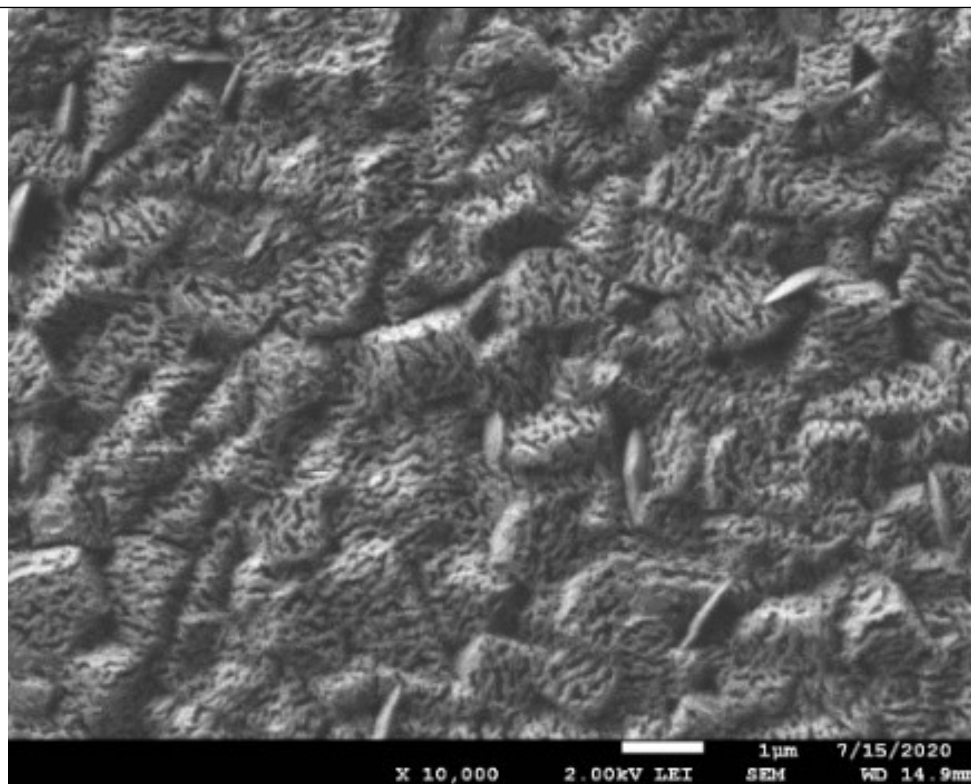

**Figure S9b. EPMA of 5 deposited at 75°C**

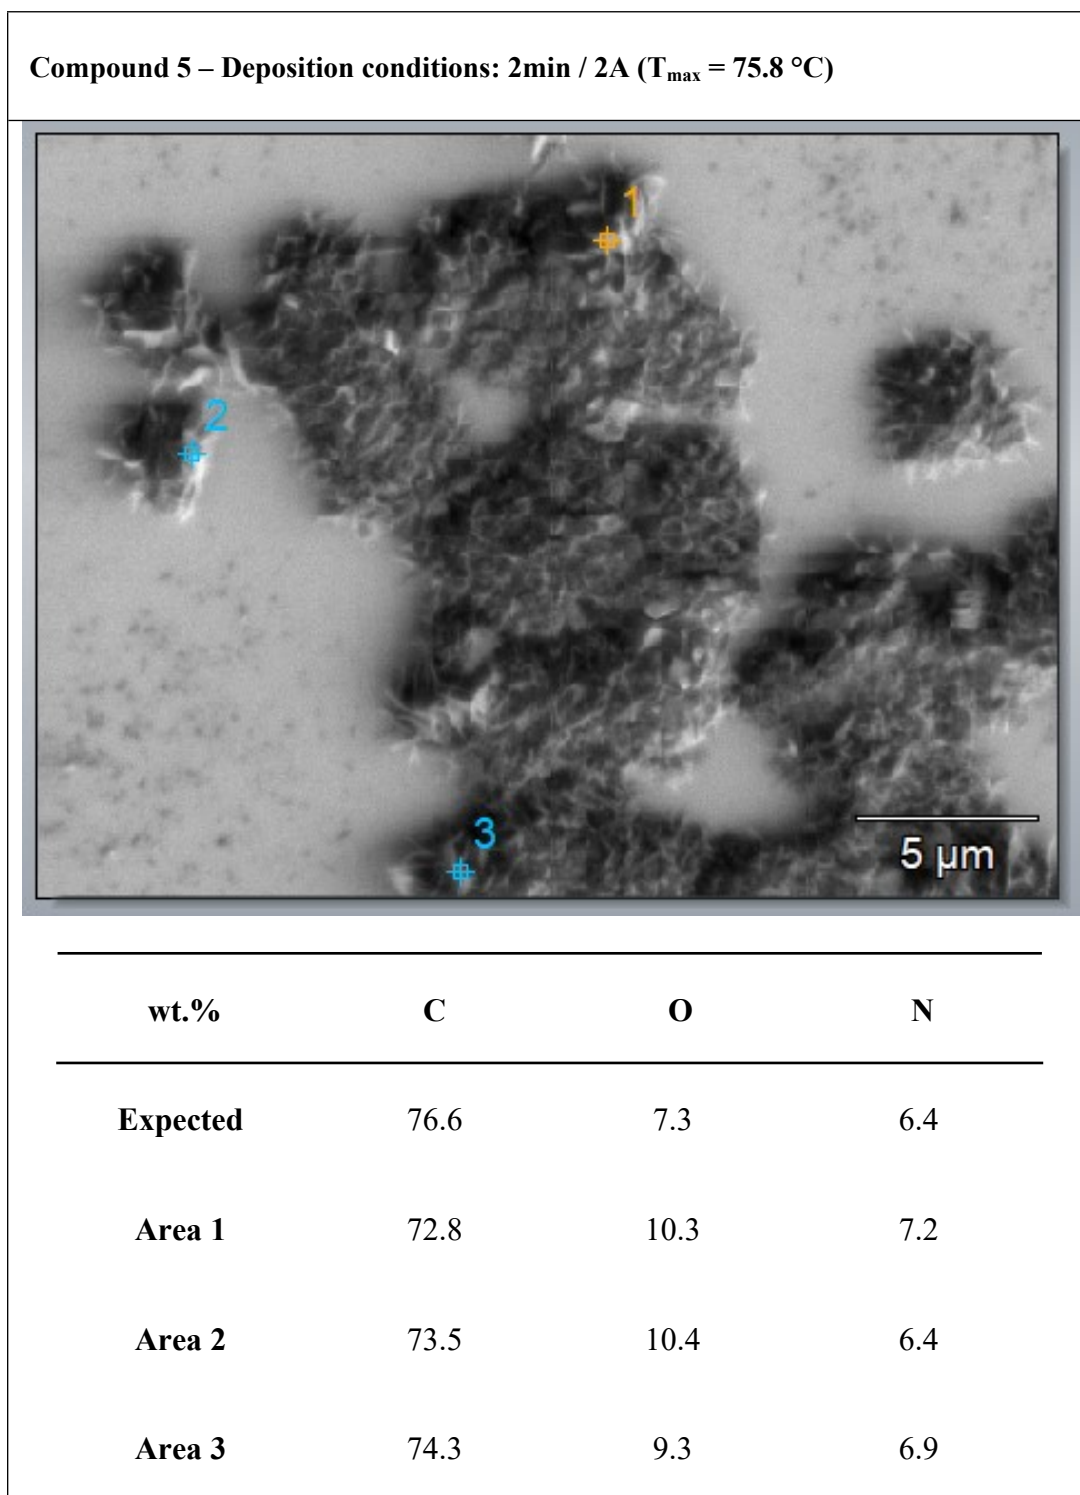



## XPS data of the deposit from PVD of diamantane 4 and its composite after gold MOCVD

Figure S10a. XPS survey spectra of 4 before (red) and after (green) deposition of gold; and comparison of atomic percentages of elements detected by XPS

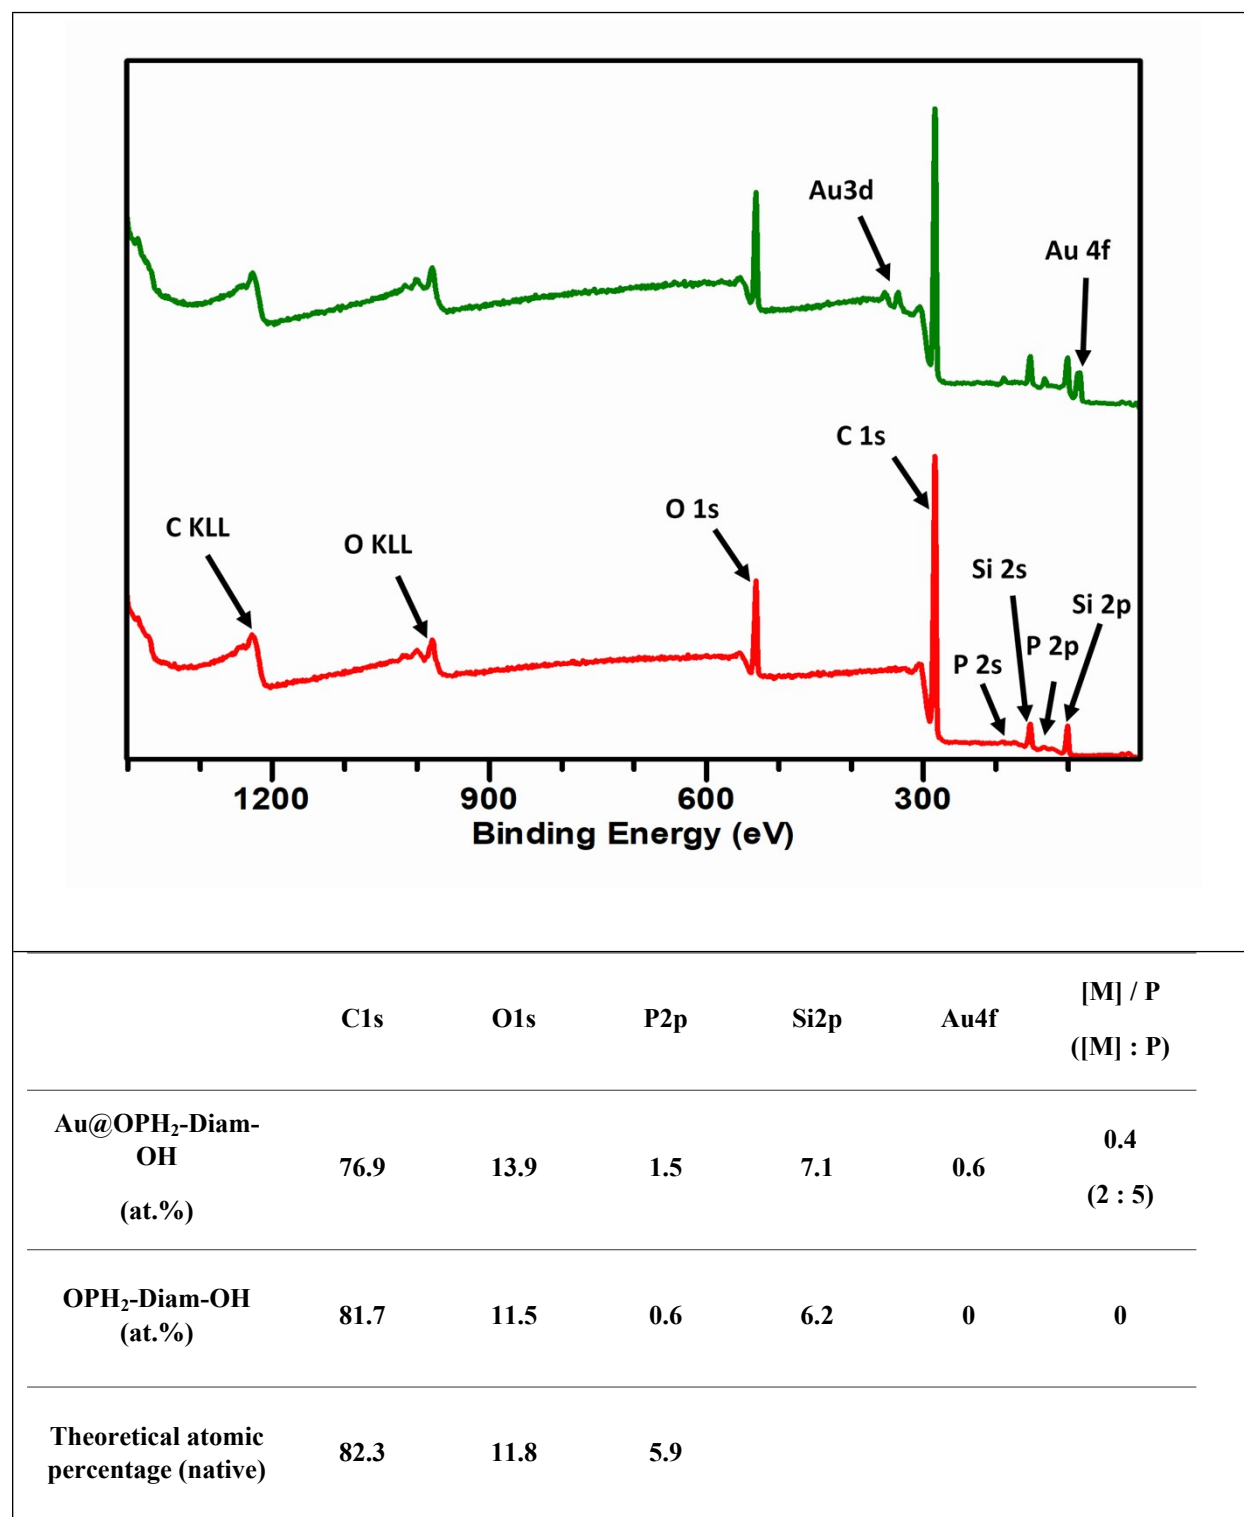

Figure S10b. High-resolution XPS spectra at P2p core level of gold-based organohybrid diamantane phosphine oxide 4 (Au@OPH<sub>2</sub>-Diam-OH, green) and before gold deposition (OPH<sub>2</sub>-Diam-OH, red).

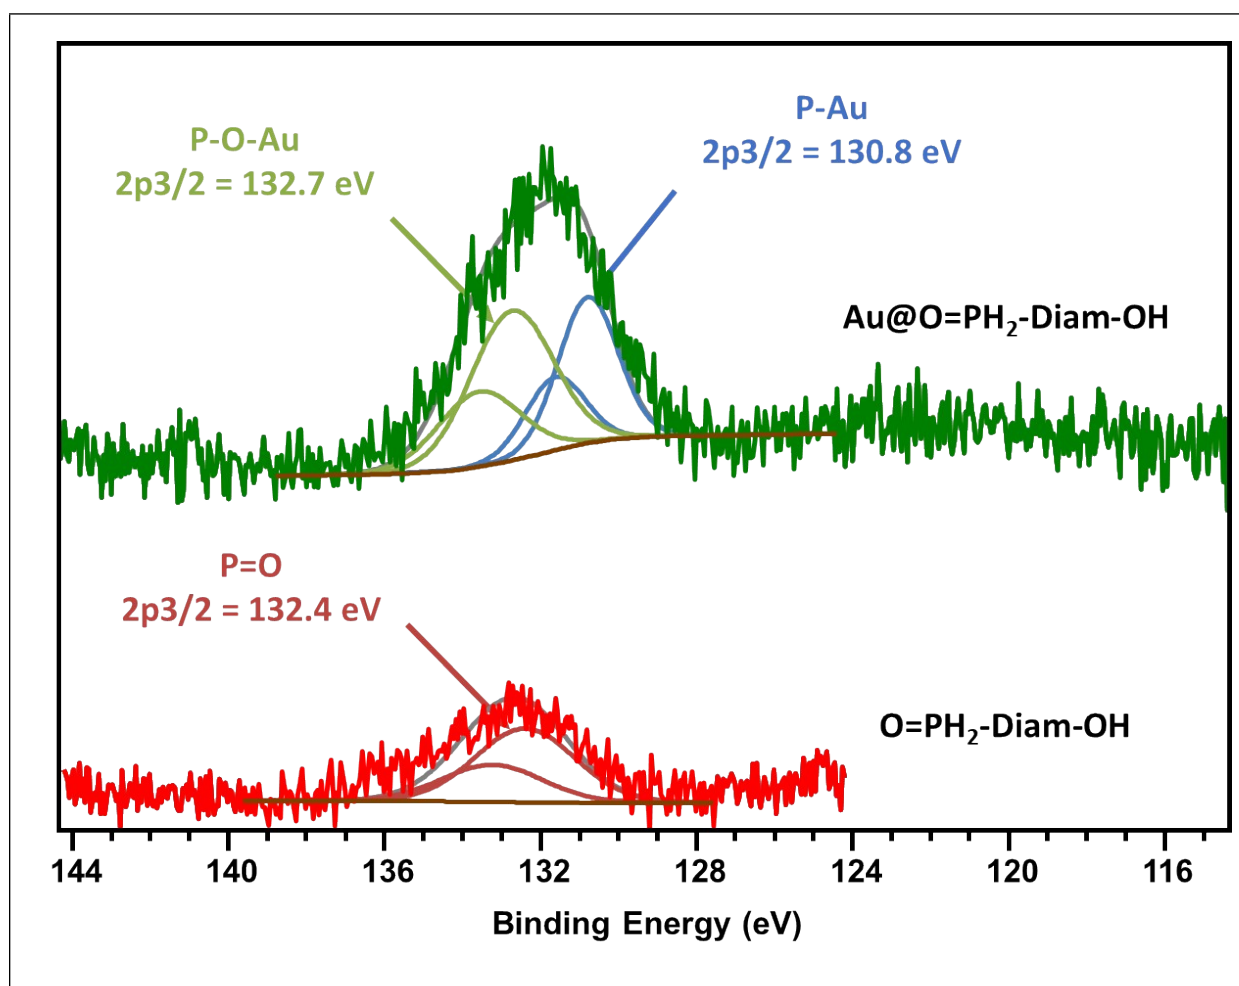

XPS data of the deposit from physical vapor deposition of diamantane 2 and its organohybrid after gold MOCVD

Figure S11a. XPS survey spectra of 2 before (red) and after (green) deposition of gold; and comparison of atomic percentages of elements detected by XPS

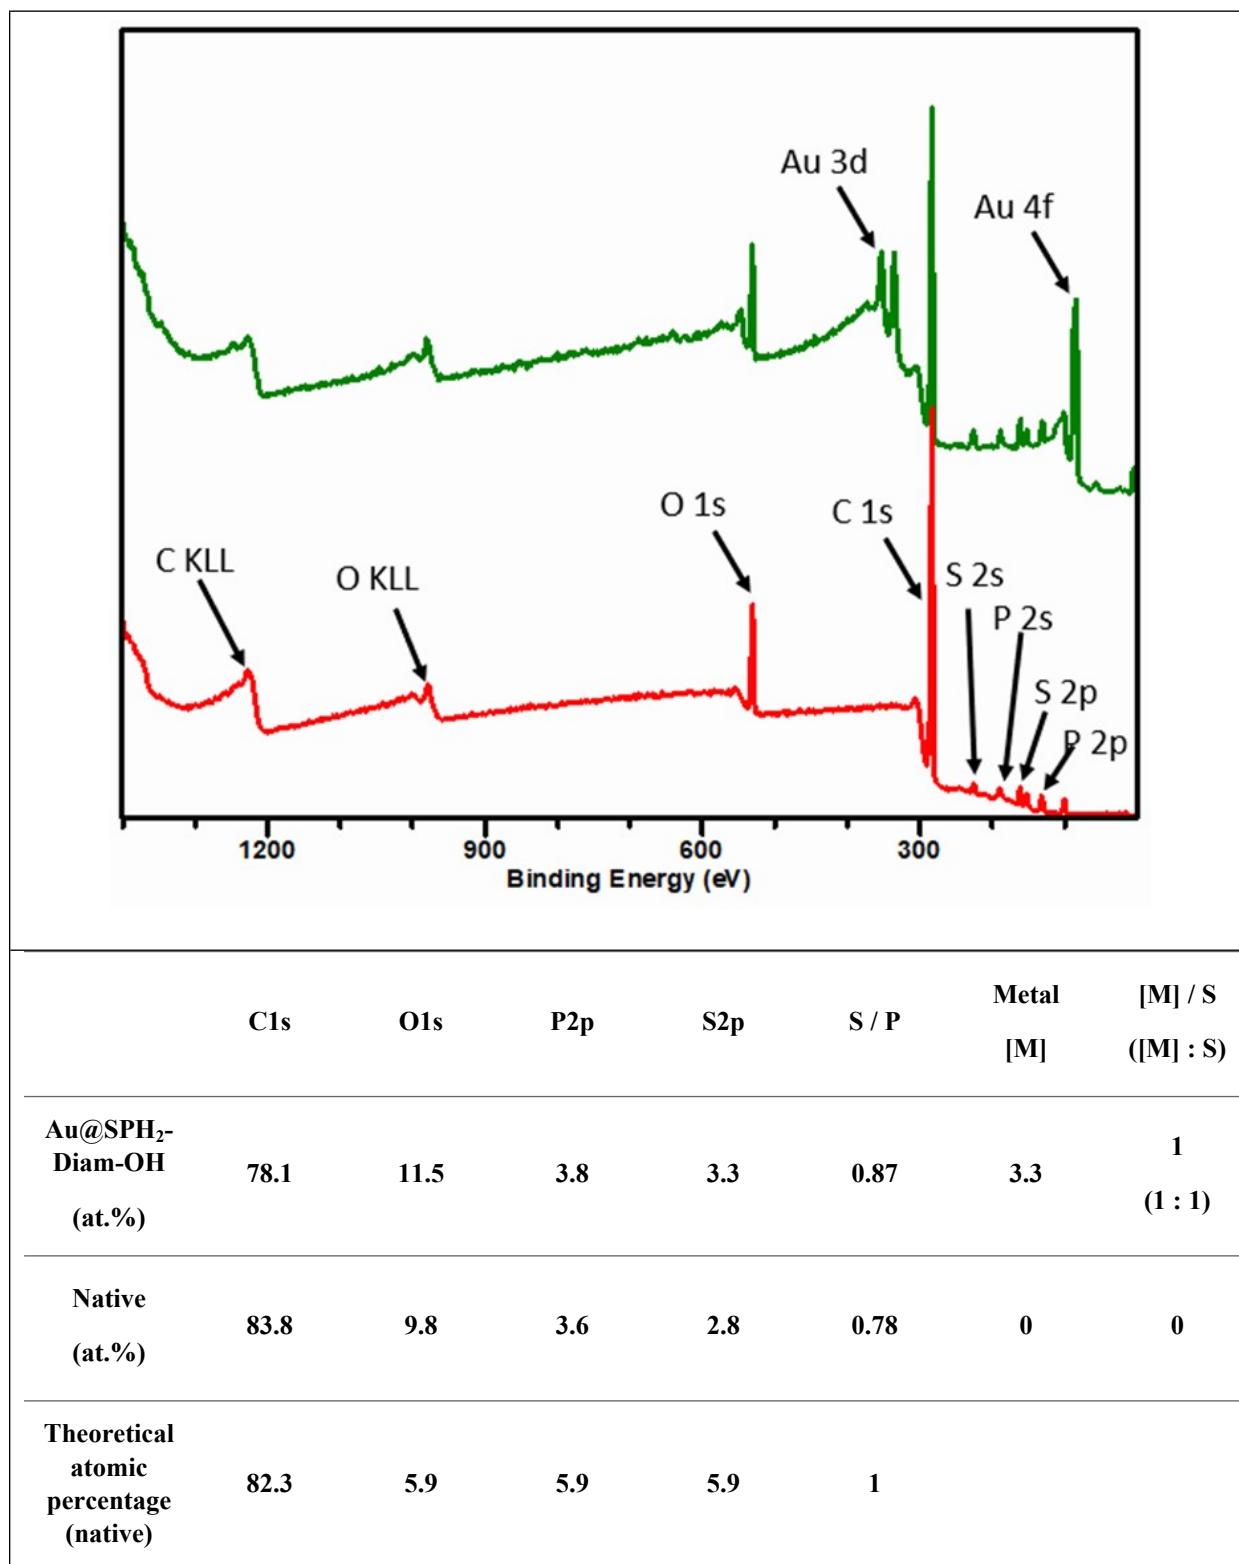



Figure S11b. High-resolution XPS spectra at P2p (top) and S2p (bottom) core levels of gold-based organohybrid diamantane phosphine oxide 4 (Au@SPH<sub>2</sub>-Diam-OH, green) and before gold deposition (SPH<sub>2</sub>-Diam-OH, red).

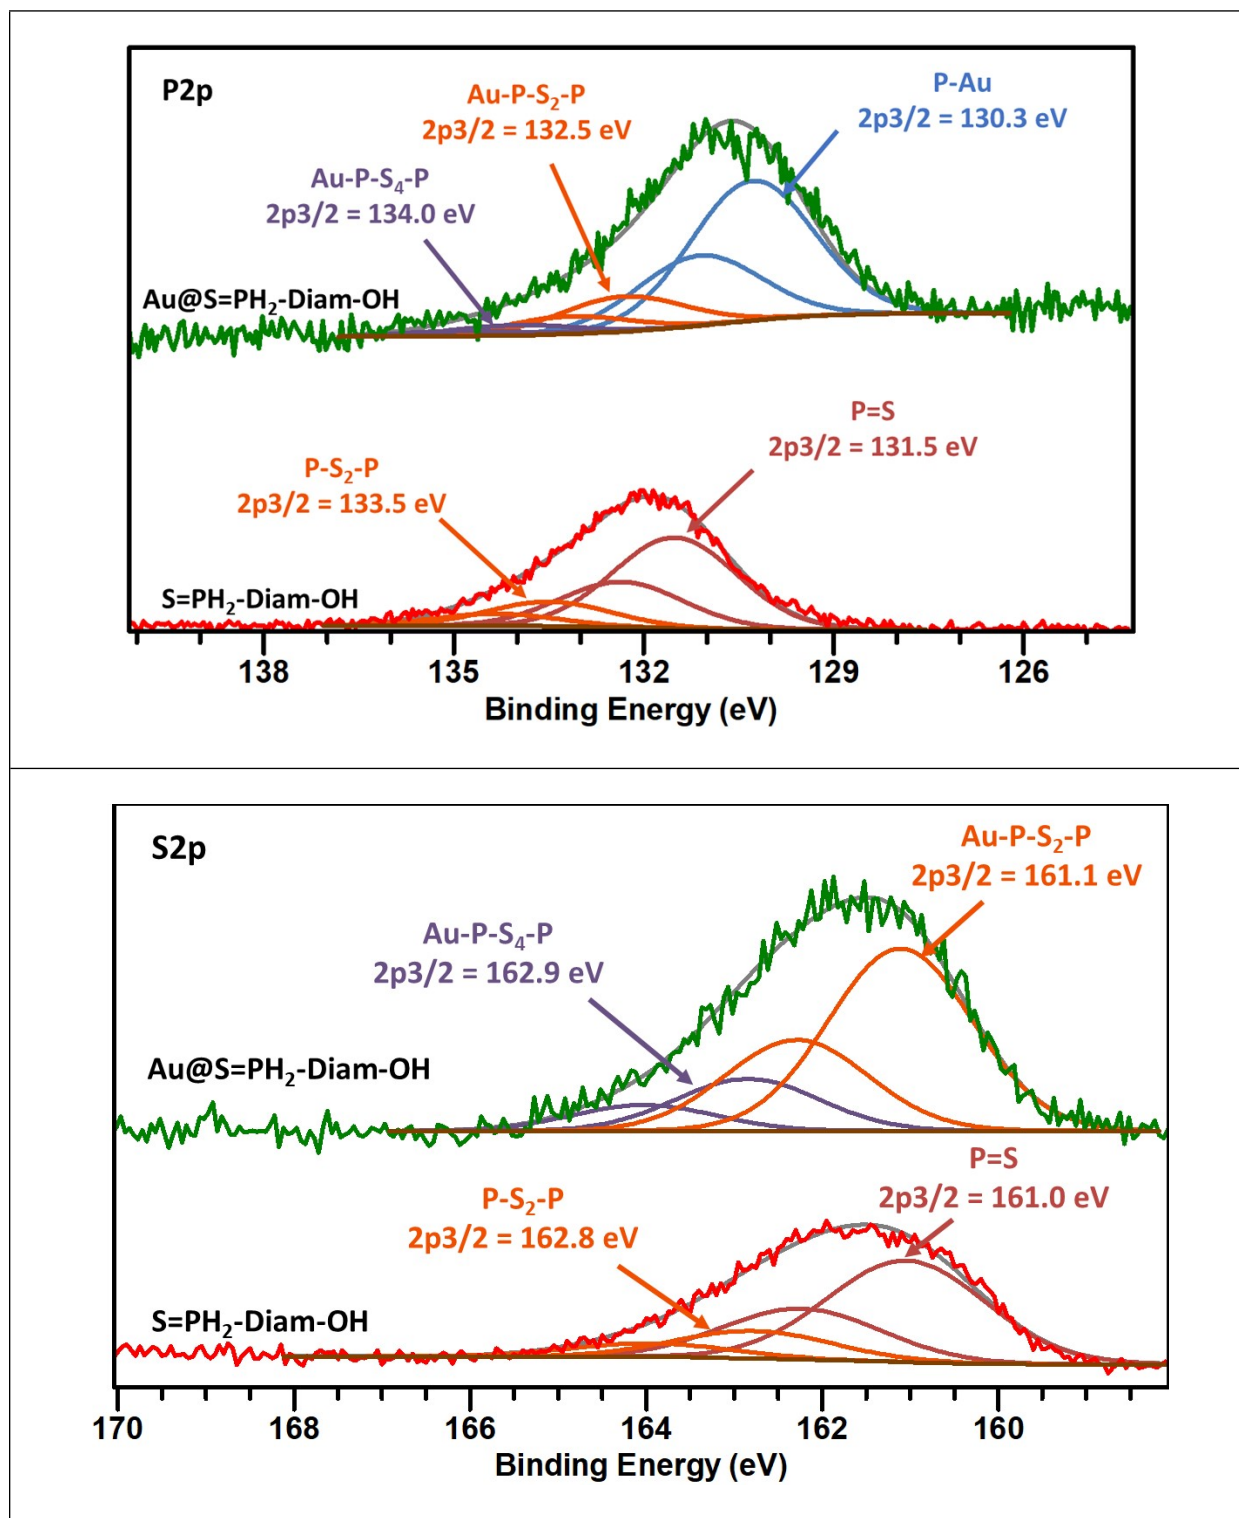

**Figure S11c. High-resolution XPS spectra at O1s core levels of gold-based organohybrid diamantane phosphine 2 (Au@S=PH<sub>2</sub>-Diam-OH, green) and before gold deposition (S=PH<sub>2</sub>-Diam-OH, red).**

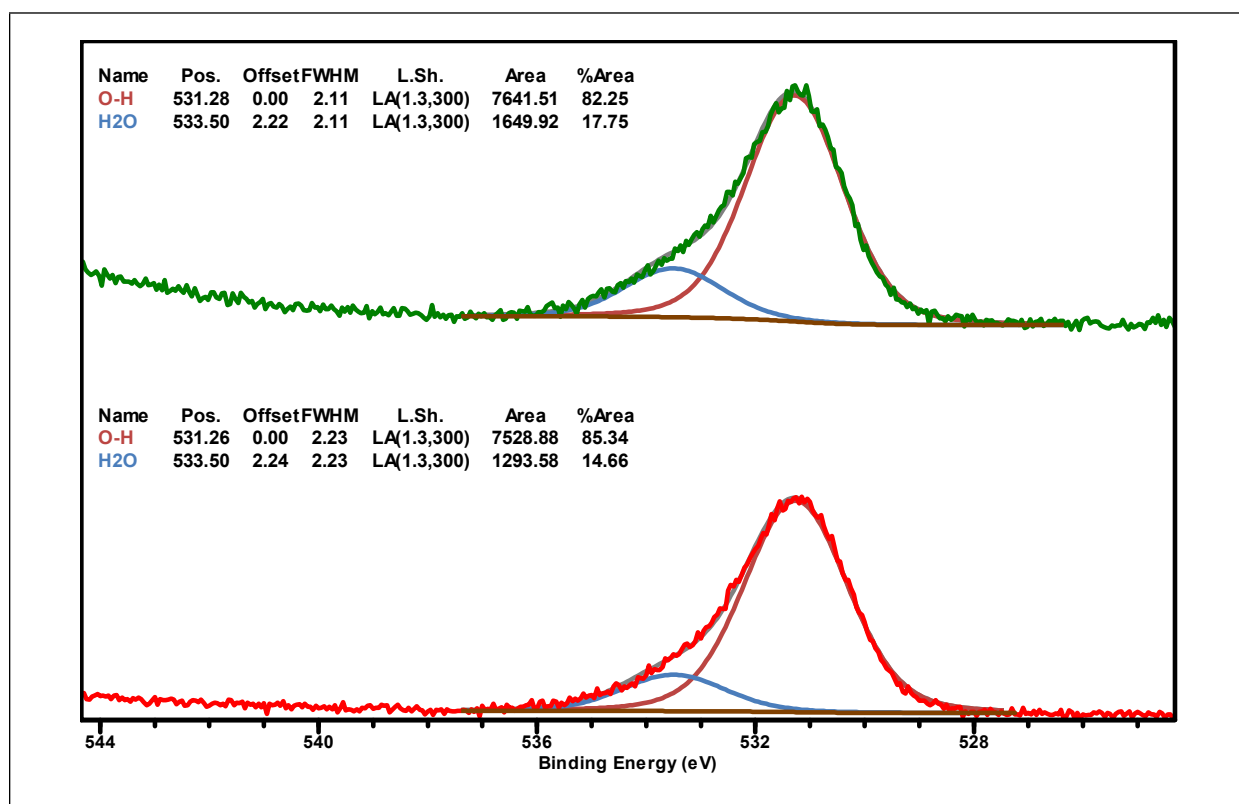

**Figure S11d. High-resolution XPS spectra at O1s core levels of gold-based organohybrid diamantane phosphine oxide 4 (Au@O=PH<sub>2</sub>-Diam-OH, green) and before gold deposition (O=PH<sub>2</sub>-Diam-OH, red).**

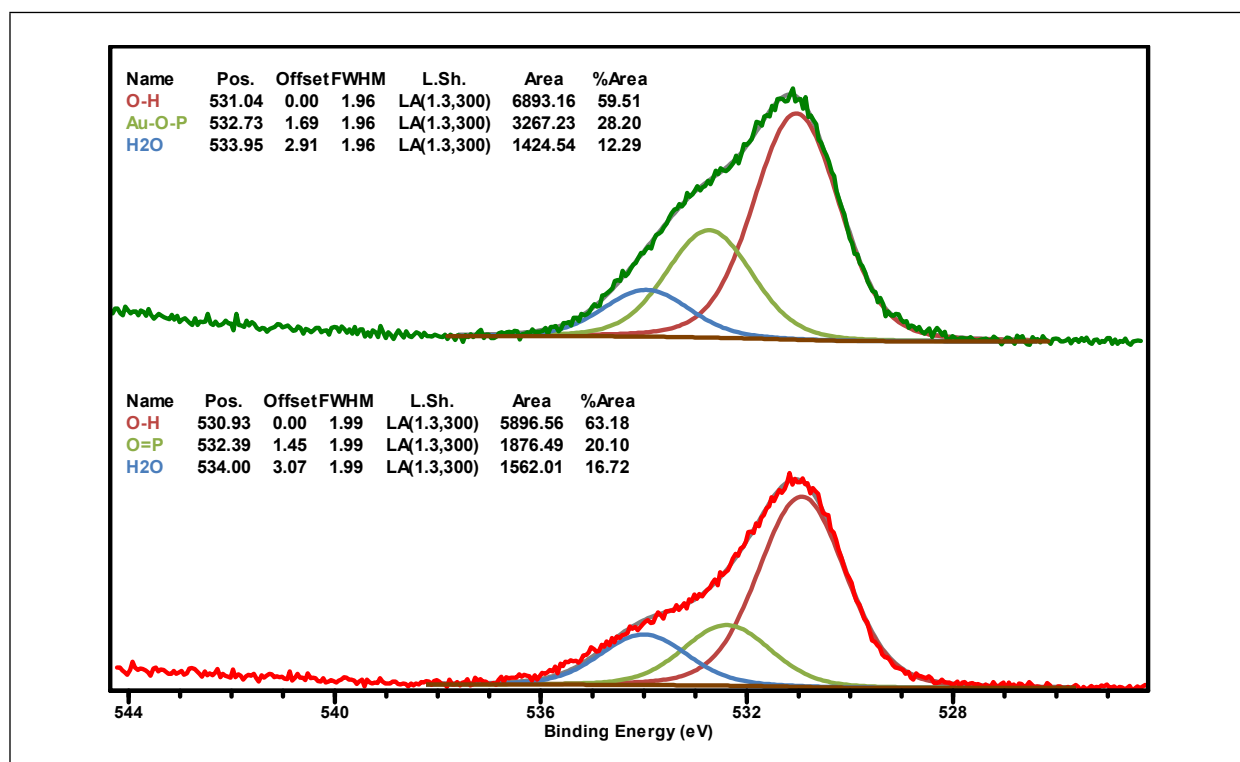

### Thermogravimetric analyses (TGA/DSC)

Thermogravimetric analyses have been performed by Simultaneous Differential Thermal Analysis (SDT), which combine both Thermogravimetric Analysis (TGA) both Differential Scanning Calorimetry (DSC) in one run. 2 mg of the compound to be analysed have been added to a platinum DSC cup and transferred to the furnace of the SDT Q600 instrument (TA instrument). An isotherm at 30 °C is applied for 5 minutes to stabilise the mass measurement. An increase of 5 °C per min have been then applied up to 400 or 800 °C. An isotherm at 100 °C for 30 min was implemented in order to eliminate sorption of water on our compounds. The curve of mass as a function of temperature is plotted as a black solid line and its derivative in blue short dash. The optimum temperature applied during PVD deposition is indicated on the curve of the mass derivative as a function of temperature.

**Figure S12a. SDT data of difunctionalized diamantane 1**

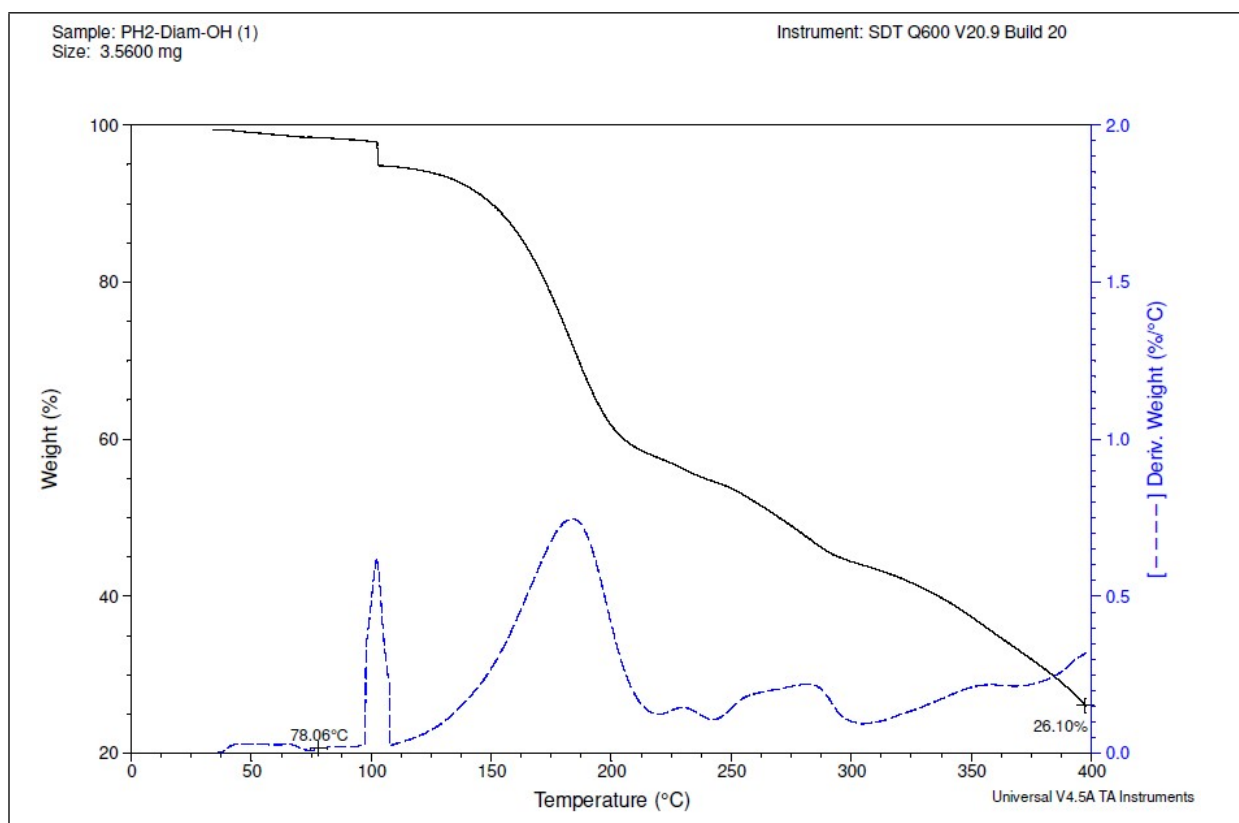

**Figure S12b. SDT data of difunctionalized diamantane 2**

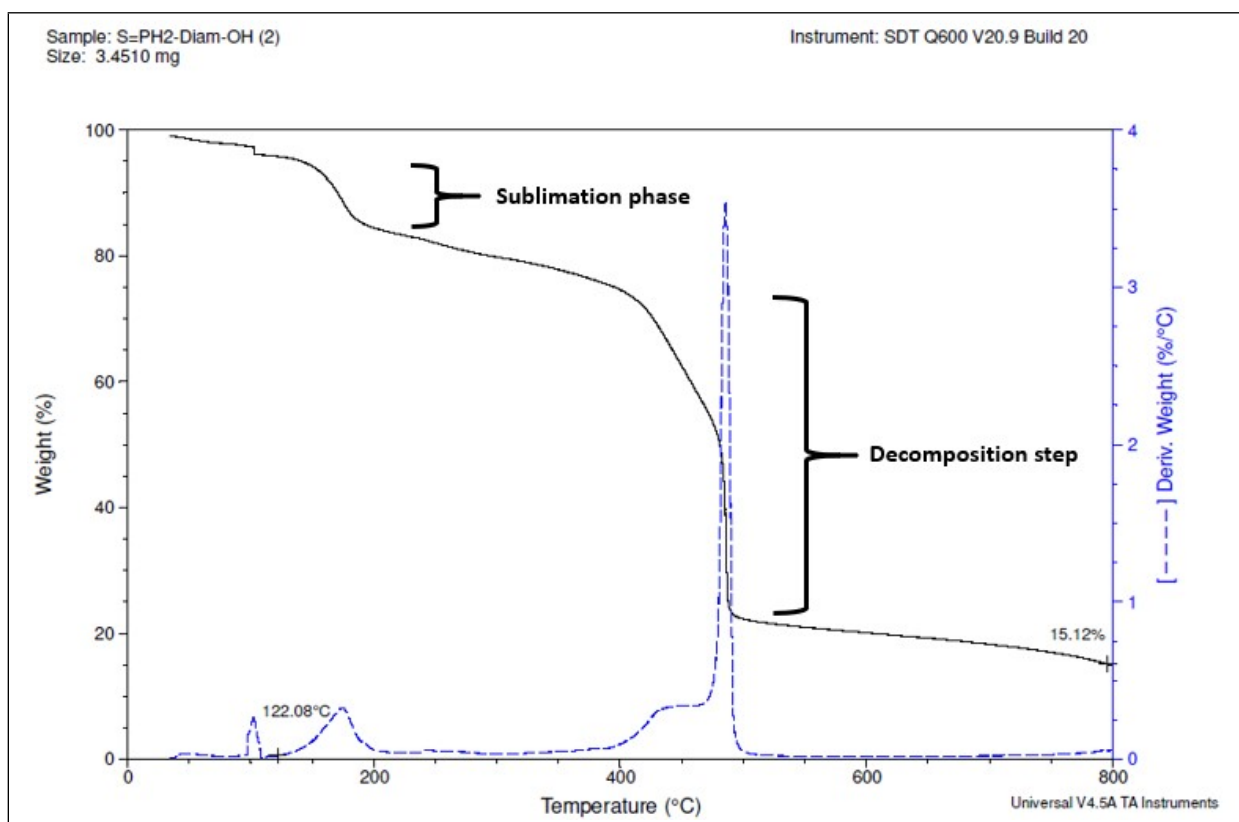

**Figure S12c. SDT data of difunctionalized diamantane 3**

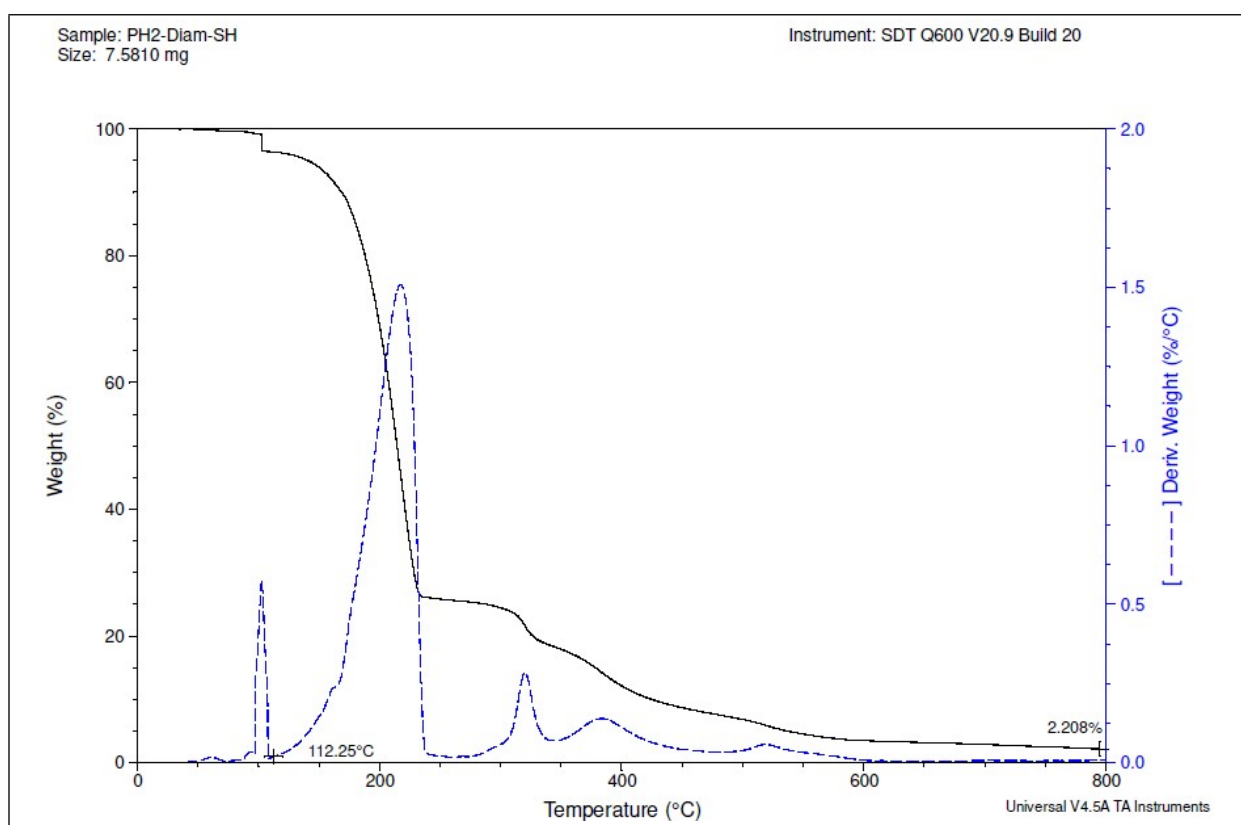

**Figure S12d. SDT data of difunctionalized diamantane 4**

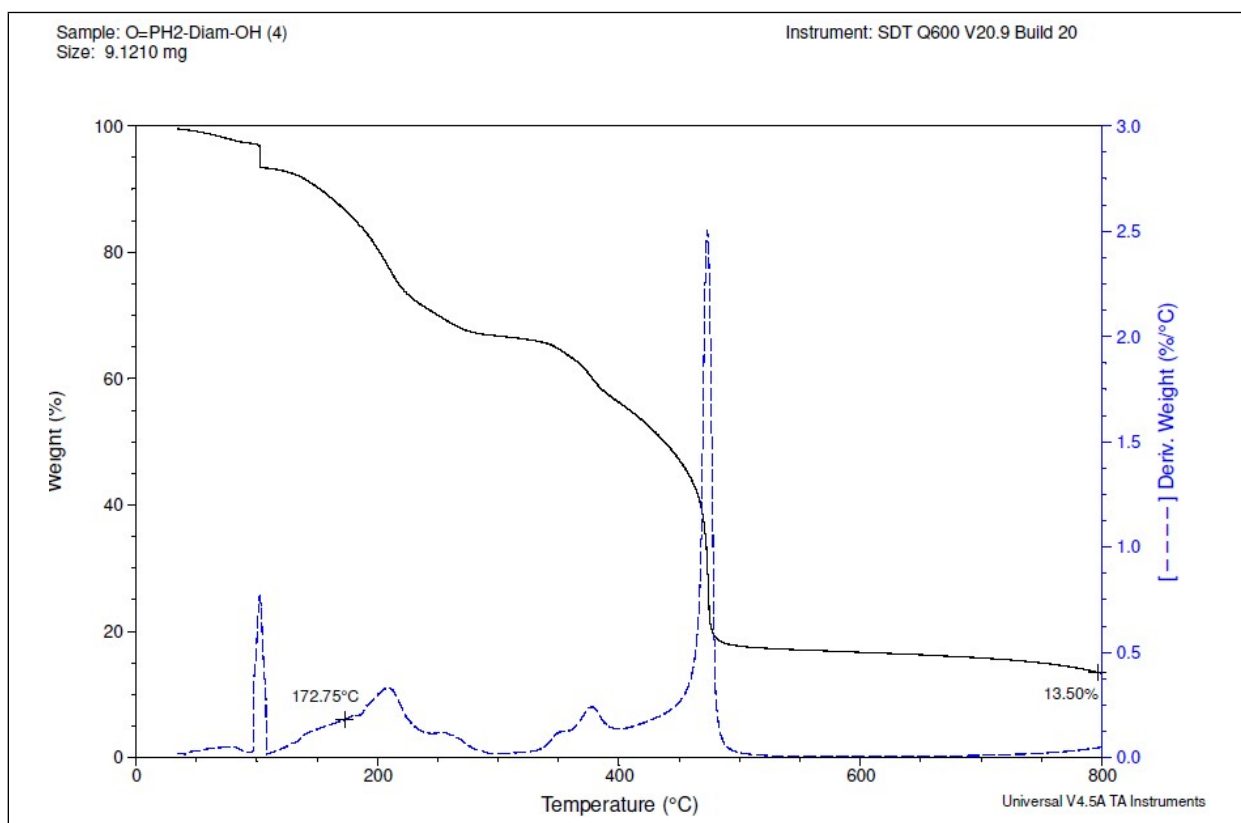

**Figure S12e. SDT data of difunctionalized diamantane 5**

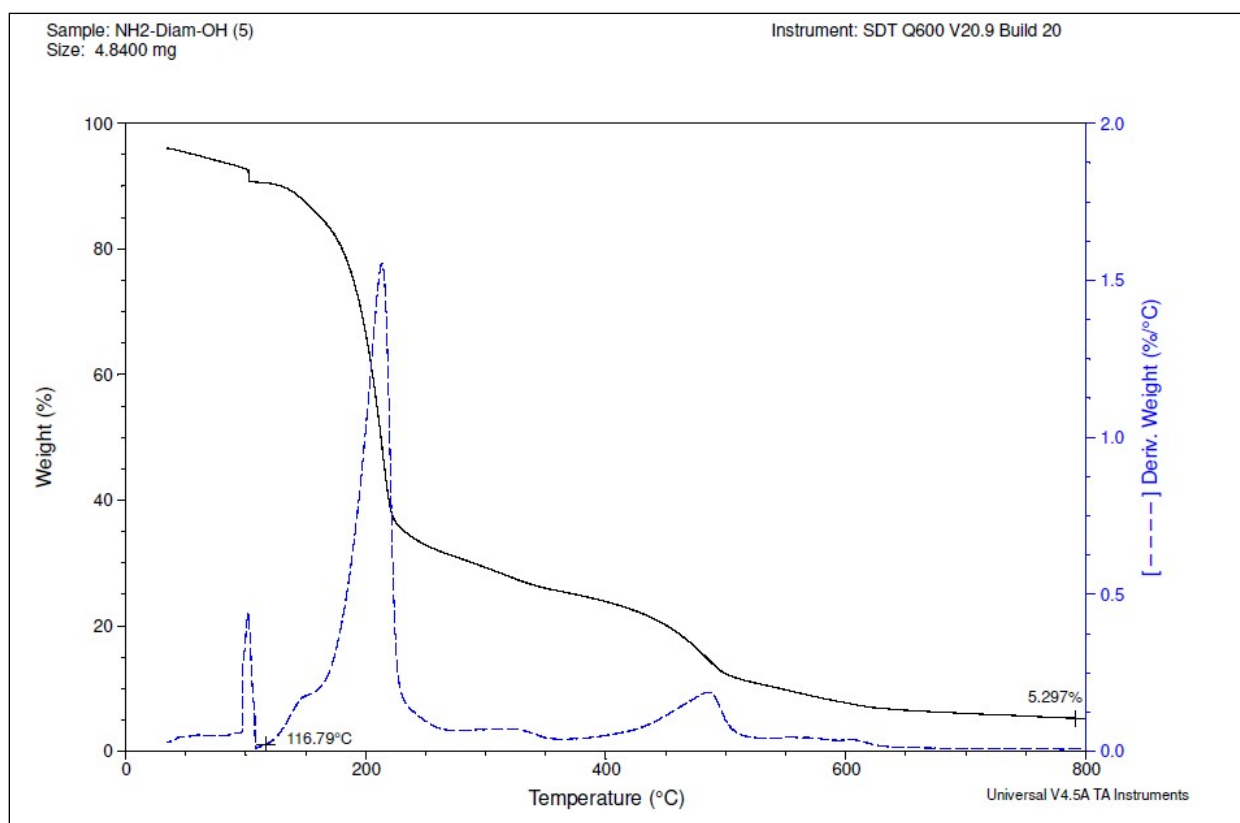

**Figure S12f. SDT data of organometallic complex MeAuP(Me)<sub>3</sub>**

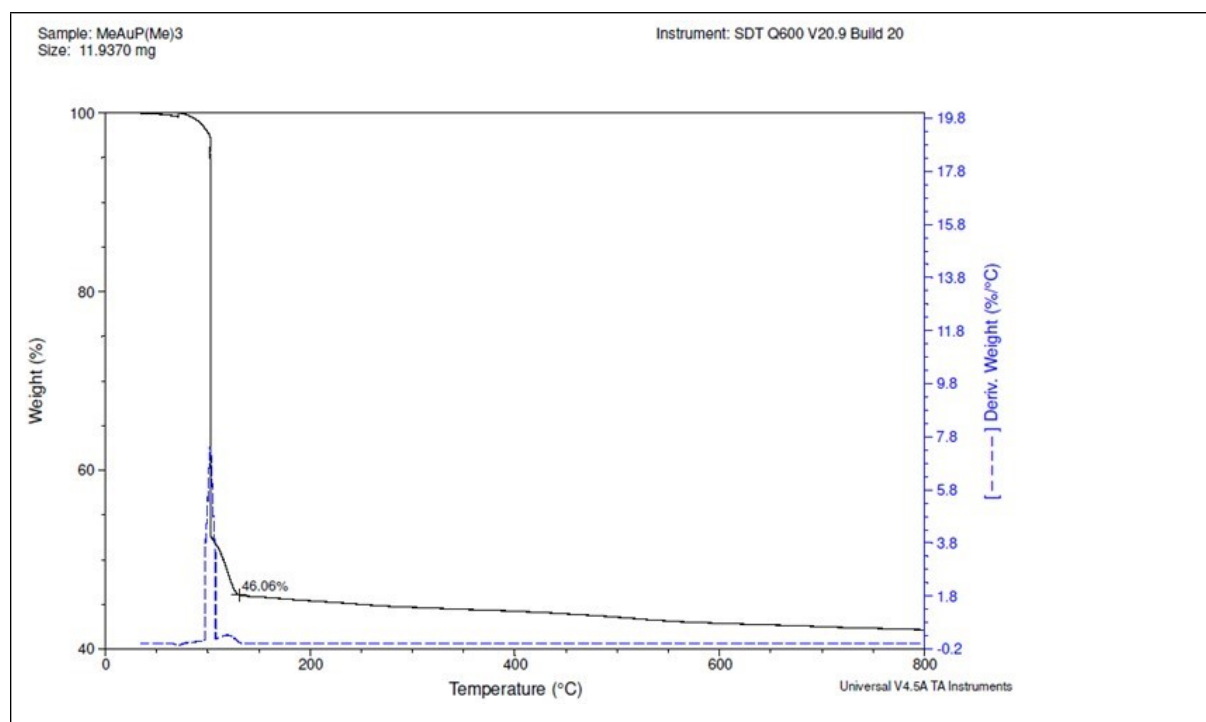

The SDT analyses of organometallic complex  $\text{MeAuP}(\text{Me})_3$  show a significant loss of mass from 95°C to 130°C, attributed to sublimation of the complex, with a remaining percentage of 46.06%. From pure decomposition the expected percentage of gold in the complex should be 68.39% (molecular weight of gold, equal to 196.97 g.mol<sup>-1</sup>, divided by the total molecular mass of the organometallic complex, equal to 288.03 g.mol<sup>-1</sup>). This percentage of only 46.06 % of gold is due to a decomposition step which starts at around 115 °C while the complex evaporation step takes place starting at 95°C.

**Figure S12g. Overlay of SDT data of difunctionalized diamantane 1 to 5**

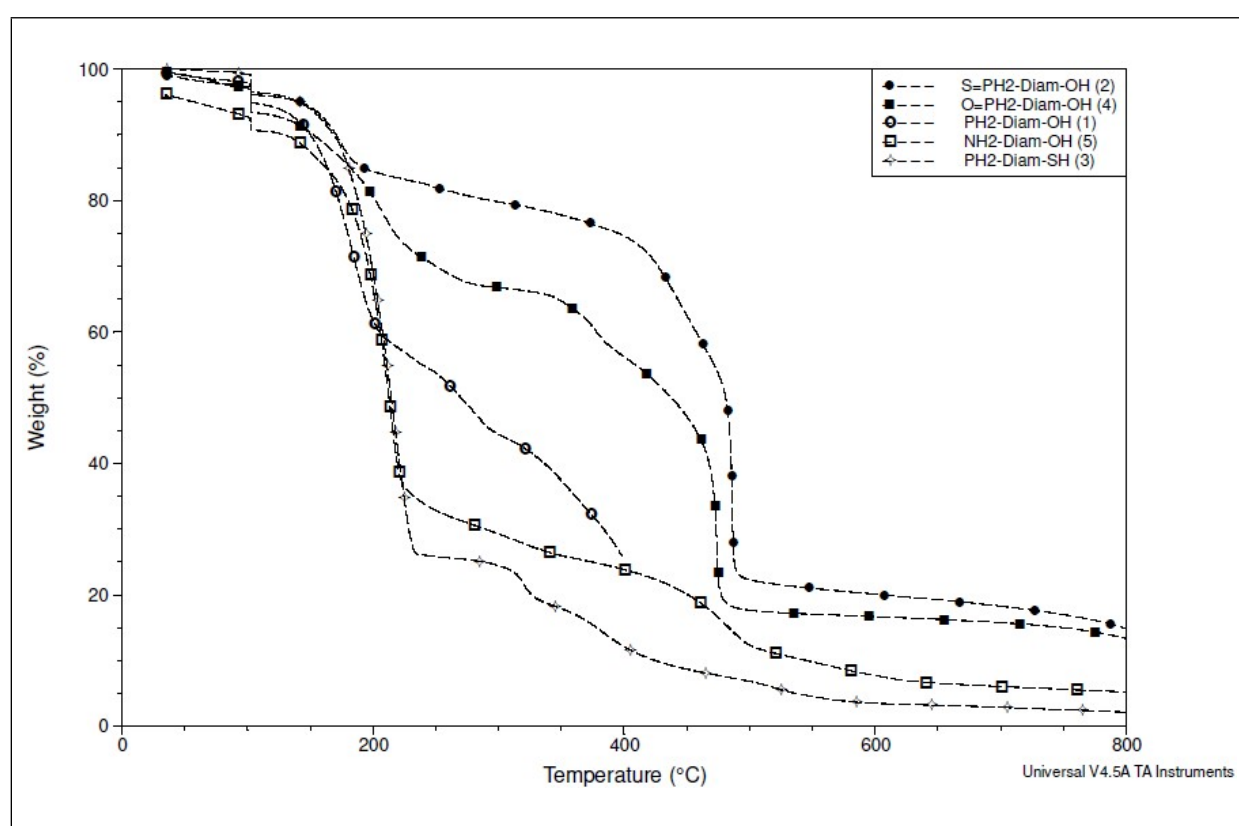

The overlay of SDT data of difunctionalized diamantane **1** to **5** highlights the differences in the thermal stability (and volatility) of difunctionalized diamantane as a function of chemical modifications carried out either on the phosphine group or on the hydroxyl group. Interestingly, the difunctionalized diamantane **2** shows the greatest thermal up to 400 °C.
